# Supplementary material for: Caspase-8 auto-cleavage regulates programmed cell death and collaborates with RIPK3/MLKL to prevent lymphopenia
Source: PubMed Central journal article supplement (PMC9345959; doi:10.1038/s41418-022-00938-9), 2022-01-21

1 **Caspase-8 auto-cleavage regulates programmed cell death**  
2 **and collaborates with RIPK3/MLKL to prevent**  
3 **lymphopenia**

4  
5 **Xiaoming Li<sup>1,6</sup>, Fang Li<sup>2,5,6</sup>, Xixi Zhang<sup>1</sup>, Haiwei Zhang<sup>1</sup>, Qun Zhao<sup>1</sup>, Ming Li<sup>1</sup>,**  
6 **Xiaoxia Wu<sup>1</sup>, Lingxia Wang<sup>1</sup>, Jianling Liu<sup>1</sup>, Xuanhui Wu<sup>1</sup>, Yangjing Ou<sup>1</sup>, Mingyan**  
7 **Xing<sup>1</sup>, Yue Zhang<sup>3</sup>, Jiangshan Deng<sup>4</sup>, Xiuzhe Wang<sup>4</sup>, Yan Luo<sup>3</sup>, Jinbao Li<sup>2</sup>, Yuwu**  
8 **Zhao<sup>4</sup>, Haibing Zhang<sup>1\*</sup>**

9  
10 **<sup>1</sup> CAS Key Laboratory of Nutrition, Metabolism and Food Safety, Shanghai**  
11 **Institute of Nutrition and Health, University of Chinese Academy of Sciences,**  
12 **Chinese Academy of Sciences, Shanghai, China**

13 **<sup>2</sup> Department of Anesthesiology, Shanghai General Hospital, Shanghai Jiao tong**  
14 **University School of Medicine, Shanghai, China.**

15 **<sup>3</sup> Department of Anesthesiology, Ruijin Hospital, Shanghai Jiao Tong University**  
16 **School of Medicine, Shanghai, China.**

17 **<sup>4</sup> Department of Neurology, Shanghai Jiao Tong University Affiliated Sixth**  
18 **People's Hospital, Shanghai, China.**

19 **<sup>5</sup> The Second Affiliated Hospital, School of Medicine, Southern University of**  
20 **Science and Technology, Shenzhen, China.**

21 **<sup>6</sup> These authors contributed equally to this work**

22 **\*Correspondence: [hbzhang@sibs.ac.cn](mailto:hbzhang@sibs.ac.cn)**

23

24

25 **Abstract**

26 Caspase-8 is an initiator of death receptor-induced apoptosis and an inhibitor of RIPK3-  
27 MLKL-dependent necroptosis. In addition, caspase-8 has been implicated in diseases  
28 such as lymphoproliferation, immunodeficiency, and autoimmunity in humans.  
29 Although auto-cleavage is indispensable for caspase-8 activation, its physiological  
30 functions remain poorly understood. Here, we generated a caspase-8 mutant lacking  
31 E385 in auto-cleavage site knock-in mouse (*Casp8*<sup>ΔE385/ΔE385</sup>). *Casp8*<sup>ΔE385/ΔE385</sup> cells  
32 were expectedly resistant to Fas-induced apoptosis, however, *Casp8*<sup>ΔE385/ΔE385</sup> cells  
33 could switch TNF-α-induced apoptosis to necroptosis by attenuating RIPK1 cleavage.  
34 More importantly, CASP8(ΔE385) sensitized cells to RIPK3-MLKL-dependent  
35 necroptosis through promoting complex II formation and RIPK1-RIPK3 activation.  
36 Notably, *Casp8*<sup>ΔE385/ΔE385</sup>*Ripk3*<sup>-/-</sup> mice partially rescued the perinatal death of *Ripk1*<sup>-/-</sup>  
37 mice by blocking apoptosis and necroptosis. In contrast to the *Casp8*<sup>-/-</sup>*Ripk3*<sup>-/-</sup> and  
38 *Casp8*<sup>-/-</sup>*Mkl1*<sup>-/-</sup> mice appearing autoimmune lymphoproliferative syndrome (ALPS),  
39 both *Casp8*<sup>ΔE385/ΔE385</sup>*Ripk3*<sup>-/-</sup> and *Casp8*<sup>ΔE385/ΔE385</sup>*Mkl1*<sup>-/-</sup> mice developed transplantable  
40 lymphopenia that could be significantly reversed by RIPK1 heterozygosity, but not by  
41 RIPK1 kinase dead mutation. Collectively, these results demonstrate previously  
42 unappreciated roles for caspase-8 auto-cleavage in regulating necroptosis and  
43 maintaining lymphocytes homeostasis.

44

45 **Keywords:**

46 Caspase-8, auto-cleavage, RIPK1, RIPK3, MLKL, apoptosis, necroptosis,  
47 lymphopenia, lymphocytes homeostasis

48

49 **INTRODUCTION**

50 Caspase-8 is a cysteinyl aspartate-specific protease that critically mediates extrinsic  
51 apoptosis<sup>1, 2, 3, 4, 5</sup> but also inhibits necroptosis<sup>6, 7, 8, 9, 10, 11</sup>. In addition, caspase-8 is  
52 known to be crucially involved in the inflammatory response by acting as a scaffolding  
53 protein<sup>12, 13, 14, 15, 16</sup>. Previous studies demonstrated the death of *Casp8*<sup>-/-</sup> mice from  
54 RIPK3-MLKL mediated necroptosis<sup>9, 10</sup>. This result highlights the critical role of the  
55 catalytic activity of caspase-8-cFLIP complex in necroptosis inhibition<sup>9</sup>. In accordance  
56 with that, the conditional ablation of caspase-8 in the intestinal epithelial cells or  
57 keratinocytes also leads to the inflammation and aberrant cell death in the intestine and  
58 skin, respectively<sup>17, 18, 19, 20, 21</sup>. This can be prevented by the co-deletion of *Ripk3*<sup>17, 18, 19,</sup>  
59 <sup>20, 21</sup>, indicating that caspase-8 is required for tissue homeostasis by suppressing  
60 necroptosis. Moreover, mice expressing catalytically inactive RIPK3 D161N exhibit  
61 caspase-8-dependent embryonic lethality<sup>22</sup>, suggesting that caspase-8 mediated  
62 apoptosis plays an essential role during embryonic development. In addition, caspase-  
63 8 phosphorylation mimic T265E knock-in mice were lately reported to be  
64 embryonically lethal<sup>23</sup>, which indicated the phosphorylation of caspase-8 impaired the  
65 blockade of necroptosis during embryo development. Furthermore, caspase-8-mediated  
66 apoptosis in association with caspase-11 and gasdermin-D-mediated epithelial cell  
67 death to regulate gut homeostasis and inflammation<sup>20, 24</sup>. Recent studies have  
68 demonstrated that deficiency of the enzymatic activity of  
69 CASP8(C362S)/CASP8(C362A) not only promotes necroptosis but also triggers  
70 pyroptosis when necroptosis is inhibited *in vivo*<sup>6, 8</sup>. The expression of catalytically  
71 inactive caspase-8 leads to embryonic lethality in mice that can be prevented by deletion  
72 of *Ripk3* or co-ablation of *Mkl1* and *Casp1*<sup>6, 8</sup>, suggesting that the enzymatic activity of  
73 caspase-8 plays a critical role in the regulation of pyroptosis when apoptosis and  
74 necroptosis are compromised. In addition to the regulation of cell death, caspase-8  
75 contributes to the maintenance of immune homeostasis<sup>11, 25, 26, 27</sup>. When embryonic  
76 lethality in *Casp8*-deficient mice is rescued by *Ripk3* or *Mkl1* ablation, the *Casp8*<sup>-/-</sup>  
77 *Ripk3*<sup>-/-</sup> and *Casp8*<sup>-/-</sup>*Mkl1*<sup>-/-</sup> mice develop lymphadenopathy<sup>11</sup> that resembles the  
78 abnormality observed in Fas ligand (FasL, CD95L)<sup>28</sup> or FAS<sup>29, 30</sup> deficient mice and

79 human autoimmune lymphoproliferative syndrome (ALPS)<sup>31,32</sup>. *Casp8*<sup>C362A/C362A</sup>*Ripk3*<sup>-/-</sup>  
80 mice also develop splenomegaly<sup>8</sup>, indicating the potential of catalytic activity of  
81 caspase-8 in immune homeostasis. Besides, caspase-8 mutation in humans causes  
82 immunodeficiency<sup>26</sup> in addition to ALPS, which can be explained by the mechanisms  
83 that caspase-8 cleaves and inactivates a cytokine production suppressor NEDD4-  
84 binding protein 1 (N4BP1)<sup>33</sup>. However, caspase-8 mutations in humans have also been  
85 linked to inflammatory bowel disease (IBD)<sup>34</sup> and multi-organ lymphocytic infiltration  
86 with granulomas<sup>27</sup>, and the precise mechanisms underlying this relationship remain  
87 elusive.

88

89 On ligating with the death receptor, auto-cleavage leads to the activation of caspase-8<sup>35</sup>,  
90 <sup>36,37,38,39,40</sup>. This initiates apoptosis, and in turn, inhibits necroptosis by cleaving critical  
91 necroptotic mediators such as CYLD<sup>41</sup>, c-FLIP<sup>42</sup>, RIPK1<sup>7,43</sup> and RIPK3<sup>44</sup>. Furthermore,  
92 complete caspase-8 activation requires dimerization and auto-cleavage of procaspase-  
93 8 to unlock the enzymatic activity<sup>35,36,37,45</sup>. The mice harboring mutation of caspase-8  
94 auto-cleavage site at D387 developed normally and was impaired in extrinsic apoptosis  
95 *in vivo*<sup>7,13,46,47</sup>, and recent study showed that the non-cleavable caspase-8 caused  
96 inflammation and induced ASC oligomerization in the lack of FADD<sup>13</sup>. However, the  
97 role of auto-cleavage of caspase-8 in regulating necroptosis and cell death-independent  
98 function remains undefined.

99

100 Here, we generated knock-in mouse bearing caspase-8 mutation lacking E385 in the  
101 auto-cleavage site (*Casp8*<sup>ΔE385/ΔE385</sup>) and found that caspase-8 mutation CASP8(ΔE385)  
102 not only switches TNF-α induced apoptosis to necroptosis by suppressing RIPK1  
103 cleavage, but also unexpectedly promoted necroptosis through promoting complex II  
104 and RIPK1-RIPK3 activation. In addition, *Casp8*<sup>ΔE385/ΔE385</sup>*Ripk3*<sup>-/-</sup> and  
105 *Casp8*<sup>ΔE385/ΔE385</sup>*Mkl1*<sup>-/-</sup> mice developed lymphopenia with severe splenomegaly instead  
106 of the lymphoproliferative disease as observed in *Casp8*<sup>-/-</sup>*Ripk3*<sup>-/-</sup> and *Casp8*<sup>-/-</sup>*Mkl1*<sup>-/-</sup>  
107 mice. Collectively, these results suggest that caspase-8 auto-cleavage is not only  
108 required to mediate apoptosis but also inhibit necroptosis by negatively regulating



109 complex II formation and stabilization and cooperates with RIPK3/MLKL maintaining  
110 lymphocytes homeostasis.

111 **RESULTS**

112 **1. *Casp8*<sup>ΔE385/ΔE385</sup> mice are viable but develop a slight CD8<sup>+</sup> T cell lymphopenia in**  
113 **the spleen.**

114 Previous studies have demonstrated that auto-cleavage of caspase-8 is required for  
115 mediating apoptosis but not for inhibiting necroptosis during development because the  
116 mice expressing none-cleavable Caspase-8 are viable<sup>7, 13, 46</sup>. As expected, we observed  
117 that caspase-8 cleavage was gradually enhanced when apoptosis was induced by tumor  
118 necrosis factor  $\alpha$  (TNF- $\alpha$ ) plus cycloheximide (CHX) in wild-type mouse dermal  
119 fibroblasts (MDFs) (**Figure 1A**). Notably, caspase-8 cleavage was also increased in  
120 response to necroptotic stimulation with TNF- $\alpha$  plus Smac mimetics (Smac) and the  
121 pan-caspase inhibitor Z-VAD-FMK (zVAD). This finding was verified by observing the  
122 increased levels of phosphorylated RIPK1, RIPK3, and MLKL necroptotic markers  
123 (**Figure 1B**). Therefore, in addition to its role in mediating apoptosis, caspase-8  
124 cleavage is also hypothesized to regulate necroptosis.

125 Previous studies established transgenic mice expressing caspase-8 D387A<sup>7, 13, 46</sup>, which  
126 cannot be cleaved between the large and small catalytic subunits. Caspase-8 has a  
127 substrate preference for the tetrapeptide (Leu/Val)-Glu-X-Asp<sup>48</sup>, which corresponds  
128 closely to the caspase-8 auto-processing substrate sequence, L384/E385/V386/D387.  
129 We therefore hypothesized that E385 of caspase-8 would also contribute to its auto-  
130 cleavage. To explore the contribution of caspase-8 (E385) in its auto-processing *in vitro*  
131 and *in vivo*, we generated a knock-in mouse that expressed caspase-8 lacking E385 in  
132 the auto-cleavage site between the large and small catalytic subunits (**Figure S1A**). In  
133 contrast to the embryonic lethality observed in caspase-8 deficiency<sup>49</sup> and catalytically  
134 inactive caspase-8 mice<sup>6, 8</sup>, *Casp8*<sup>ΔE385/ΔE385</sup> mice were viable and matured normally  
135 (**Figure S1B**), which was consistent with previously reported mouse lines expressing  
136 caspase-8(D387A)<sup>7, 13, 46</sup>. To test whether CASP8(ΔE385) is indeed unable to auto-  
137 process between the large and small catalytic subunits, we treated primary WT and  
138 *Casp8*<sup>ΔE385/ΔE385</sup> BMDMs with LPS/BV6 to induce apoptosis. Compared with the  
139 dramatic caspase-8 cleavage in wild-type BMDMs, caspase-8 cleavage between the

140 large and small catalytic subunits was confirmed to be blocked in *Casp8*<sup>ΔE385/ΔE385</sup>  
141 BMDMs utilizing two different antibodies (**Figure S1C**). Besides, it was observed that  
142 the expression of CASP8(ΔE385) in multiple tissues including spleen, lung, liver,  
143 kidney, colon, heart, ileum, and rectum was normal in *Casp8*<sup>ΔE385/ΔE385</sup> mice (**Figures**  
144 **1C and S1D**), suggesting that the cleavage of caspase-8 is dispensable for its expression  
145 and stability *in vivo*. Next, we examined the effect of CASP8(ΔE385) on the pathologies.  
146 Histopathological examination demonstrated that the appearance of multiple tissues  
147 was indistinguishable in *Casp8*<sup>ΔE385/ΔE385</sup> mice in comparison with the tissue appearance  
148 in WT mice (**Figure S1E**). However, we observed that the *Casp8*<sup>ΔE385/ΔE385</sup> mice  
149 developed slight splenomegaly with a mild decrease in the percentage of the CD8<sup>+</sup> T  
150 cells in the spleen and bone marrow (**Figures 1D-1F**). However, no differences were  
151 observed between *Casp8*<sup>ΔE385/ΔE385</sup> and WT mice with respect to the B cells and the  
152 myeloid cell subsets obtained from the spleen, lymph nodes, and bone marrow (**Figure**  
153 **1F**). These results show that the *Casp8*<sup>ΔE385/ΔE385</sup> mice are viable but develop a slight  
154 CD8<sup>+</sup> T cell lymphopenia with splenomegaly.

155

## 156 **2. Apoptosis induced by TNF-α was switched to necroptosis by attenuating RIPK1** 157 **cleavage in *Casp8*<sup>ΔE385/ΔE385</sup> cells.**

158 Previous studies have demonstrated that the auto-cleavage of caspase-8 is essential for  
159 the apoptosis induced by the anti-Fas antibody Jo2, *in vitro*<sup>7, 13, 46</sup> and *in vivo*<sup>13, 46</sup>.  
160 Consistently, we observed that the thymocyte apoptosis induced by anti-Fas from  
161 *Casp8*<sup>ΔE385/ΔE385</sup> mice was compromised compared to that from WT mice (**Figure S2A**),  
162 and anti-Fas antibody also induced less caspase-3 cleavage in *Casp8*<sup>ΔE385/ΔE385</sup>  
163 thymocytes (**Figure 2A**). To further investigate the role of caspase-8 cleavage in  
164 apoptosis, we treated *Casp8*<sup>ΔE385/ΔE385</sup> MDFs with a RIPK3 kinase inhibitor, GSK'872,  
165 to induce apoptosis<sup>50</sup>. We observed that *Casp8*<sup>ΔE385/ΔE385</sup> MDFs were strongly resistant  
166 to apoptosis induced by GSK'872 (**Figure 2B**). This finding was confirmed by  
167 attenuating the cleavage of caspase-3 in *Casp8*<sup>ΔE385/ΔE385</sup> MDFs (**Figure 2C**). To further  
168 verify the contribution of caspase-8 cleavage in apoptosis *in vivo*, we challenged the  
169 anti-Fas antibody, Jo2, by intravenous injection in *Casp8*<sup>ΔE385/ΔE385</sup> and WT mice. In

170 accordance with previous studies<sup>13, 46</sup>, *Casp8* <sup>$\Delta E385/\Delta E385$</sup>  mice were significantly  
171 protected from the Jo2-induced lethal effects compared to WT mice (**Figure 2D**).  
172 Accordingly, *Casp8* <sup>$\Delta E385/\Delta E385$</sup>  mice exhibited alleviated liver damage and decreased  
173 alanine aminotransferase (ALT)/aspartate aminotransferase (AST) concentrations in the  
174 plasma compared to the liver function in WT control mice (**Figures 2E and S2B**). In  
175 line with these data, we observed the absence of caspase-8 cleavage and a significant  
176 decrease in caspase-3 cleavage in the livers of *Casp8* <sup>$\Delta E385/\Delta E385$</sup>  mice (**Figure S2C**),  
177 suggesting that the lethal effects exerted by the anti-Fas antibody Jo2-induced apoptosis  
178 were decreased in *Casp8* <sup>$\Delta E385/\Delta E385$</sup>  mice *in vivo*. These results suggested that blocking  
179 cleavage between the large and small catalytic subunits by CASP8( $\Delta E385$ ) is enough  
180 to prevent apoptosis *in vitro* and *in vivo*.

181 To further investigate whether CASP8( $\Delta E385$ ) is required for TNF- $\alpha$ -induced apoptosis,  
182 we treated the *Casp8* <sup>$\Delta E385/\Delta E385$</sup>  MDFs with TNF- $\alpha$  plus Smac. In contrast to the WT  
183 MDFs showing increased caspase-8 cleavage, *Casp8* <sup>$\Delta E385/\Delta E385$</sup>  MDFs showed no  
184 detectable caspase-8 auto-cleavage between the large and small catalytic subunits  
185 (**Figure S3A**). However, in contrast with the previous findings that the apoptosis  
186 induced by GSK'872 decreased in *Casp8* <sup>$\Delta E385/\Delta E385$</sup>  MDFs, we observed that increased  
187 cell death in *Casp8* <sup>$\Delta E385/\Delta E385$</sup>  MDFs upon stimulation with TNF- $\alpha$  plus Smac/CHX  
188 compared to the death in WT MDFs (**Figure 2F**). Interestingly, we further observed  
189 that caspase-3 cleavage induced by TNF- $\alpha$  plus Smac in WT MDFs was decreased in  
190 *Casp8* <sup>$\Delta E385/\Delta E385$</sup>  MDFs (**Figure S3A**). Given that the necroptosis suppression function  
191 of caspase-8<sup>51</sup>, we speculated that CASP8( $\Delta E385$ ) could switch apoptosis to  
192 necroptosis under certain conditions. Therefore, we measured the markers of cell death  
193 pathways in MDFs in response to the stimulation by TNF- $\alpha$ /CHX and TNF- $\alpha$ /Smac.  
194 The *Casp8* <sup>$\Delta E385/\Delta E385$</sup>  MDFs showed upregulation in RIPK1, RIPK3, and MLKL  
195 phosphorylation but a decrease in RIPK1 and caspase-3 cleavage (**Figure 2G and S3A**).  
196 This indicates that the CASP8( $\Delta E385$ ) switched TNF- $\alpha$ /CHX and TNF- $\alpha$ /Smac  
197 induced caspase-3-dependent apoptosis to RIPK1-RIPK3-MLKL-mediated necroptosis  
198 owing to the attenuation of RIPK1 cleavage. Collectively, these results demonstrate that  
199 caspase-8 cleavage between the large and small catalytic subunits is required for

200 mediating apoptosis, but CASP8( $\Delta$ E385) promotes cell death switch from apoptosis to  
201 RIPK1-RIPK3-MLKL-dependent necroptosis under certain conditions.

202

203 **3. CASP8( $\Delta$ E385) promotes necroptosis upon various necroptotic stimuli both *in*  
204 *vitro* and *in vivo*.**

205 Caspase-8 suppresses RIPK3-MLKL mediated necroptosis<sup>9, 10, 11</sup>, and caspase-8  
206 catalytic activity is essential for inhibiting necroptosis during development, as  
207 demonstrated recently<sup>6, 8</sup>. To investigate the role of caspase-8 auto-cleavage in  
208 necroptosis regulation, we induced necroptosis in MDFs via TNF- $\alpha$  plus Smac and  
209 zVAD and in bone marrow-derived macrophages (BMDMs) via stimulation with LPS  
210 or poly(I:C) plus zVAD. Notably, we observed that *Casp8* <sup>$\Delta$ E385/ $\Delta$ E385</sup> MDFs and BMDMs  
211 showed excessive cell death compared to their WT counterparts, which could also be  
212 rescued by Nec-1 (**Figures 3A and 3B**). RIPK1<sup>7</sup>, RIPK3<sup>52, 53, 54</sup> and MLKL<sup>55, 56</sup> are the  
213 main executors of programmed necroptosis via cascade phosphorylation. To further  
214 investigate the mechanism by which caspase-8 cleavage regulates necroptosis, we  
215 firstly examined RIPK1-RIPK3-MLKL axis signaling. Indeed, compared with the WT  
216 MDFs, the *Casp8* <sup>$\Delta$ E385/ $\Delta$ E385</sup> MDFs showed significant increase in the phosphorylation  
217 of RIPK1, RIPK3, and MLKL and oligomerization of MLKL after TNF- $\alpha$  plus  
218 Smac/CHX and zVAD stimulation (**Figures 3C, 3D, S3B**). Similar results were  
219 observed in *Casp8* <sup>$\Delta$ E385/ $\Delta$ E385</sup> BMDMs in LPS plus zVAD-induced necroptosis (**Figure**  
220 **S3C**).

221 As the pan-caspase inhibitor Z-VAD-FMK blocked the caspase-8 enzymatic activity  
222 both in wild-type and *Casp8* <sup>$\Delta$ E385/ $\Delta$ E385</sup> cells, we wondered why *Casp8* <sup>$\Delta$ E385/ $\Delta$ E385</sup> cells  
223 still showed excessive necroptosis compared with WT cells in the presence of zVAD.  
224 Previous study demonstrated that TNF- $\alpha$  induced cell death depends on complex II,  
225 which contains RIPK1, FADD, caspase-8, RIPK3 and MLKL<sup>52, 53, 54, 57, 58, 59, 60, 61</sup>.  
226 Regulated by several pro- and anti-apoptotic and pro- and anti-necroptotic proteins<sup>6, 7,</sup>  
227 <sup>8, 41, 43, 44, 62, 63, 64</sup>, complex-II can trigger apoptosis or necroptosis. Thus, we analyzed  
228 whether complex II was enhanced in *Casp8* <sup>$\Delta$ E385/ $\Delta$ E385</sup> MDFs under necroptotic  
229 stimulation. When MDFs were stimulated by TNF- $\alpha$ /CHX/zVAD, we found obviously

230 sustained and enhanced interaction of RIPK3 and FADD with RIPK1 in  
231 *Casp8*<sup>ΔE385/ΔE385</sup> MDFs than in wild-type cells (**Figure 3E**). Furthermore, we detected  
232 dramatically increased p-Ser166 RIPK1 and p-Ser232 RIPK3 within complex II in  
233 TNFα/CHX/zVAD treated *Casp8*<sup>ΔE385/ΔE385</sup> MDFs compared to WT MDFs (**Figure 3E**).  
234 Besides, we also found enhanced complex II assembly in *Casp8*<sup>ΔE385/ΔE385</sup> BMDMs  
235 under LPS/zVAD treatment (**Figure 3F**).

236 As zVAD itself can promote complex II formation, we wondered whether  
237 *Casp8*<sup>ΔE385/ΔE385</sup> cells still showed enhanced complex II assembly in the absence of  
238 zVAD. Thus, we stimulated wild-type and *Casp8*<sup>ΔE385/ΔE385</sup> MDFs with TNF-α/CHX.  
239 We found that TNF-α/CHX treatment can still induce increased interaction of caspase-  
240 8, FADD and RIPK3 with RIPK1 in *Casp8*<sup>ΔE385/ΔE385</sup> cells instead of the WT cells  
241 (**Figure 3G**), suggesting that caspase-8 cleavage can negatively regulated complex II  
242 assembly. Besides, we also found increased phosphorylation of RIPK1, RIPK3 and  
243 decreased caspase-3 cleavage in TNF-α/CHX treated *Casp8*<sup>ΔE385/ΔE385</sup> MDFs, which  
244 also indicated that CASP8(ΔE385) switched TNF-α/CHX induced apoptosis to  
245 necroptosis (**Figure 3G**). Prior evidence showed that stimulation of the Toll-like  
246 receptor (TLR) and an IAP inhibitor, can also trigger complex II assembly<sup>15, 65, 66</sup>. Thus,  
247 we treated BMDMs with TLR4 agonist LPS plus BV6 to induce complex II formation.  
248 Consistently, LPS/BV6 treatment also induced markedly enhanced complex II  
249 formation in *Casp8*<sup>ΔE385/ΔE385</sup> BMDMs compared with WT counterpart (**Figure S3D**).  
250 Collectively, these results demonstrate that CASP8(ΔE385) functions as a scaffold to  
251 promote complex II formation in order that the recruitment of RIPK3-caspase-8-FADD  
252 and RIPK1-RIPK3 cascade phosphorylation were significantly increased and  
253 prolonged, which results in excess necroptosis in *Casp8*<sup>ΔE385/ΔE385</sup> cells. In addition,  
254 TNF-α-induced lethal systemic inflammatory syndrome has been widely recognized as  
255 a mouse model to confirm necroptosis *in vivo*<sup>7, 23</sup>. Therefore, we tested whether  
256 CASP8(ΔE385) affects the lethal SIRS model in *Casp8*<sup>ΔE385/ΔE385</sup> mice. In comparison  
257 to WT, *Casp8*<sup>ΔE385/ΔE385</sup> mice showed significantly sensitized death accompanied by  
258 severe hypothermia (**Figures 4A and 4B**). Furthermore, *Ripk3*<sup>-/-</sup>*Casp8*<sup>ΔE385/ΔE385</sup> and  
259 *Ripk1*<sup>K45A/K45A</sup>*Casp8*<sup>ΔE385/ΔE385</sup> mice were protected to a large extent from the lethal

260 shock (**Figures 4A and 4B**). Moreover, to examine whether caspase-8 cleavage  
261 suppresses necroptosis in macrophages *in vivo*, WT, *Casp8<sup>ΔE385/ΔE385</sup>* and *Ripk1<sup>+/-</sup>Ripk3<sup>-/-</sup>*  
262 *Casp8<sup>ΔE385/ΔE385</sup>* mice were pretreated with zVAD followed by challenging with LPS  
263 administration. After 24 h, the CD11b<sup>+</sup>F4/80<sup>+</sup> intraperitoneal macrophages (PMs) were  
264 detected by flow cytometry. The CD11b<sup>+</sup>F4/80<sup>+</sup> PMs harvested from *Casp8<sup>ΔE385/ΔE385</sup>*  
265 mice were dramatically decreased compared to those observed in WT mice after the  
266 LPS plus zVAD treatment, and the excessive peripheral macrophages loss in  
267 *Casp8<sup>ΔE385/ΔE385</sup>* mice was largely protected in *Ripk1<sup>+/-</sup>Ripk3<sup>-/-</sup>Casp8<sup>ΔE385/ΔE385</sup>* mice  
268 (**Figures 4C, 4D**). Collectively, these data reveal that caspase-8 cleavage is essential  
269 for suppressing RIPK1-RIPK3-MLKL-mediated necroptotic death *in vitro* and *in vivo*.

270

271 **4. *Casp8<sup>ΔE385/ΔE385</sup>Ripk3<sup>-/-</sup>* mice develop serious lymphopenia and myeloid bias but**  
272 **prevent postnatal lethality in *Ripk1<sup>-/-</sup>* mice.**

273 *Casp8<sup>-/-</sup>Ripk3<sup>-/-</sup>* and *Casp8<sup>-/-</sup>Mlkl<sup>-/-</sup>* mice<sup>11</sup>, characterized by splenomegaly with a  
274 marked accumulation of CD3<sup>+</sup>CD4<sup>+</sup>CD8<sup>-</sup>B220<sup>+</sup> T cells, resemble the deficiency of FAS  
275 ligand (FasL, CD95L)<sup>28</sup> or FAS (CD95)<sup>29, 30</sup> in mice or the autoimmune  
276 lymphoproliferative syndrome (ALPS) in humans<sup>31</sup>. To investigate the role of caspase-  
277 8 auto-cleavage in this disease, we generated *Casp8<sup>ΔE385/ΔE385</sup>Ripk3<sup>-/-</sup>* and  
278 *Casp8<sup>ΔE385/ΔE385</sup>Mlkl<sup>-/-</sup>* mice by crossing *Casp8<sup>ΔE385/ΔE385</sup>* mice to *Ripk3<sup>-/-</sup>* or *Mlkl<sup>-/-</sup>*  
279 background. Remarkably, *Casp8<sup>ΔE385/ΔE385</sup>Ripk3<sup>-/-</sup>* and *Casp8<sup>ΔE385/ΔE385</sup>Mlkl<sup>-/-</sup>* mice  
280 develop severe lymphopenia characterized by fewer lymphocytes in multiple organs  
281 (**Figures 5B, 5D, S4A, S4B**). Although *Casp8<sup>ΔE385/ΔE385</sup>* mice developed slight  
282 splenomegaly and CD8<sup>+</sup> T cell lymphopenia in the spleen, *Casp8<sup>ΔE385/ΔE385</sup>Ripk3<sup>-/-</sup>* and  
283 *Casp8<sup>ΔE385/ΔE385</sup>Mlkl<sup>-/-</sup>* mice developed more severe splenomegaly and showed a  
284 dramatically decreased percentage of B cells (CD19<sup>+</sup>) and T cells (CD3<sup>+</sup>) as well as an  
285 increased percentage of myeloid-derived cells (CD11b<sup>+</sup>) in the spleen and bone marrow  
286 (**Figures 5A, S4A, and S4B**). This result indicates the possibility of lymphopenia and  
287 myeloid bias/myeloproliferative disease in these mice. Next, we counted the absolute  
288 cell number and observed a plummeted number of B cells (CD19<sup>+</sup>) and T cells (CD3<sup>+</sup>)  
289 in the spleen and bone marrow (**Figure 5B**). The macrophages and granulocytes

290 (CD11b<sup>+</sup>) were rapidly increased in the spleen but were approximately normal in the  
291 bone marrow (**Figure 5B**). These results characterized the lymphopenia and myeloid  
292 bias disease but excluded the possibility of myeloproliferative disease in these mice.  
293 Furthermore, we analyzed the subsets of B cells and T cells in the spleen and bone  
294 marrow. Consistent with the percentage results (**Figure S4C**), immature and mature B  
295 cells (B220<sup>+</sup>IgM<sup>+</sup>/B220<sup>hi</sup>CD19<sup>hi</sup>), progenitor B cells (pro-B) and precursor B cells (pre-  
296 B) (B220<sup>+</sup>IgM<sup>-</sup>/B220<sup>low</sup>CD19<sup>low</sup>), and CD8<sup>+</sup> T cells showed a dramatic decrease in the  
297 bone marrow of *Casp8*<sup>ΔE385/ΔE385</sup>*Ripk3*<sup>-/-</sup> and *Casp8*<sup>ΔE385/ΔE385</sup>*Mkl1*<sup>-/-</sup> mice (**Figures 5C**  
298 **and S4D**). In the spleen, the absolute cell numbers of peripheral B cells and T cells  
299 were also decreased (**Figure 5C**). Taken together, these data showed that the  
300 *Casp8*<sup>ΔE385/ΔE385</sup>*Ripk3*<sup>-/-</sup> and *Casp8*<sup>ΔE385/ΔE385</sup>*Mkl1*<sup>-/-</sup> mice develop severe myeloid bias  
301 and lymphopenia in the spleen and bone marrow.

302

303 To further confirm the presence of lymphopenia in these mice, we next analyzed the  
304 peripheral blood. Indeed, *Casp8*<sup>ΔE385/ΔE385</sup>*Ripk3*<sup>-/-</sup> and *Casp8*<sup>ΔE385/ΔE385</sup>*Mkl1*<sup>-/-</sup> mice  
305 showed a distinct decrease in white blood cell (WBC) and lymphocytes but normal  
306 numbers of monocytes and granulocytes in the blood (**Figure 5D**). Interestingly,  
307 *Casp8*<sup>ΔE385/ΔE385</sup> mice showed a minor increase in the WBC and lymphocyte counts  
308 (**Figure 5D**). Furthermore, the total levels of B cells (CD19<sup>+</sup>), T cells (CD3<sup>+</sup>) as well  
309 as mature B cells (B220<sup>+</sup>IgM<sup>+</sup>/B220<sup>+</sup>CD19<sup>+</sup>) and T cells subsets (CD3<sup>+</sup>CD4<sup>+</sup>CD8<sup>-</sup>  
310 /CD3<sup>+</sup>CD8<sup>+</sup>CD4<sup>-</sup>) sharply decreased in the blood of *Casp8*<sup>ΔE385/ΔE385</sup>*Ripk3*<sup>-/-</sup> and  
311 *Casp8*<sup>ΔE385/ΔE385</sup>*Mkl1*<sup>-/-</sup> mice (**Figure 5E**). Collectively, these results demonstrate that  
312 caspase-8 cleavage associated with RIPK3 or MLKL plays a critical role in maintaining  
313 immune cell homeostasis.

314 In addition, *Ripk3*<sup>-/-</sup>*Casp8*<sup>-/-</sup> can rescue the postnatal lethality of *Ripk1*<sup>-/-</sup> mice by  
315 inhibiting both apoptosis and necroptosis<sup>67, 68</sup>. Therefore, we examined whether  
316 CASP8(ΔE385) combined with the ablation of *Ripk3* contributed to the perinatal death  
317 of *Ripk1*<sup>-/-</sup> mice. We generated *Ripk1*<sup>-/-</sup>*Ripk3*<sup>-/-</sup>*Casp8*<sup>ΔE385/ΔE385</sup> mice by intercrossing  
318 *Ripk1*<sup>+/-</sup>*Ripk3*<sup>-/-</sup>*Casp8*<sup>ΔE385/ΔE385</sup> mice. *Ripk1*<sup>-/-</sup>*Ripk3*<sup>-/-</sup>*Casp8*<sup>ΔE385/ΔE385</sup> mice survived  
319 normally at birth; however, they were runted with apparent focal cutaneous lesions and



320 scaling on the skin, and eventually died around two weeks after birth (**Figures 5F and**  
321 **S5A**). These data suggest that caspase-8 cleavage mediated apoptosis combined with  
322 RIPK3 dependent necroptosis was partially responsible for the perinatal lethality of  
323 RIPK1 deficiency mice. This observation further confirmed that Caspase-8 cleavage is  
324 essential for apoptosis during development.

325

## 326 **5. Halve the expression of RIPK1 rescues transplantable lymphopenia in** 327 ***Casp8<sup>ΔE385/ΔE385</sup>Ripk3<sup>-/-</sup>* mice.**

328 Although *Ripk1<sup>-/-</sup>Ripk3<sup>-/-</sup>Casp8<sup>ΔE385/ΔE385</sup>* mice did not survive to adulthood, we  
329 found that *Ripk1<sup>+/-</sup>Ripk3<sup>-/-</sup>Casp8<sup>ΔE385/ΔE385</sup>* mice were viable beyond weaned and fertile.  
330 Furthermore, splenomegaly in *Ripk3<sup>-/-</sup>Casp8<sup>ΔE385/ΔE385</sup>* mice was largely suppressed in  
331 *Ripk1<sup>+/-</sup>Ripk3<sup>-/-</sup>Casp8<sup>ΔE385/ΔE385</sup>* mice (**Figure 6A**). Consistently, myeloid bias and  
332 lymphopenia in the spleen and lymphopenia in the bone marrow were also significantly  
333 relieved in *Ripk1<sup>+/-</sup>Ripk3<sup>-/-</sup>Casp8<sup>ΔE385/ΔE385</sup>* mice compared to those in *Ripk3<sup>-/-</sup>*  
334 *Casp8<sup>ΔE385/ΔE385</sup>* mice (**Figures 6B**). In addition, *Ripk1<sup>+/-</sup>Ripk3<sup>-/-</sup>Casp8<sup>ΔE385/ΔE385</sup>* mice  
335 exhibited normal immature and mature B cells (B220<sup>+</sup>IgM<sup>+</sup>/B220<sup>hi</sup>CD19<sup>hi</sup>) in the bone  
336 marrow (**Figures S5B and S5D**). Importantly, the complete blood count results showed  
337 increased WBC and lymphocyte in the peripheral blood of *Ripk1<sup>+/-</sup>Ripk3<sup>-/-</sup>*  
338 *Casp8<sup>ΔE385/ΔE385</sup>* mice compared to WT mice (**Figures 6C**), suggesting that lymphopenia  
339 and myeloid bias in *Ripk3<sup>-/-</sup>Casp8<sup>ΔE385/ΔE385</sup>* mice were largely alleviated by halving  
340 RIPK1 dosage.

341 To further test whether RIPK1 kinase activity contributed to lymphopenia in *Ripk3<sup>-/-</sup>*  
342 *Casp8<sup>ΔE385/ΔE385</sup>* mice, we generated *Ripk1<sup>K45A/K45A</sup>Ripk3<sup>-/-</sup>Casp8<sup>ΔE385/ΔE385</sup>* mice and  
343 observed that *Ripk1<sup>K45A/K45A</sup>Ripk3<sup>-/-</sup>Casp8<sup>ΔE385/ΔE385</sup>* mice showed lymphopenia and  
344 myeloid bias similar to *Ripk3<sup>-/-</sup>Casp8<sup>ΔE385/ΔE385</sup>* mice (**Figures 6A-6C and S5B-S5D**).  
345 Collectively, these results demonstrate that RIPK1 dosage-dependent and RIPK1  
346 kinase-independent scaffold function contributes to lymphopenia and myeloid bias in  
347 *Ripk3<sup>-/-</sup>Casp8<sup>ΔE385/ΔE385</sup>* mice.

348

349 Next, we asked whether lymphopenia was intrinsic to *Ripk3<sup>-/-</sup>Casp8<sup>ΔE385/ΔE385</sup>* and *Mlkl<sup>-/-</sup>*

350  $^{-/}Casp8^{\Delta E385/\Delta E385}$  hematopoietic stem cells (HSCs). The complete bone marrow of  
351  $Ripk3^{-/}Casp8^{\Delta E385/\Delta E385}$  and  $Mlkl^{-/}Casp8^{\Delta E385/\Delta E385}$  mice was transplanted into lethally  
352 irradiated syngeneic WT recipients (**Figure S6A**). After hematopoiesis was  
353 reestablished, we observed that the mice receiving  $Mlkl^{-/}Casp8^{\Delta E385/\Delta E385}$  bone marrow  
354 developed splenomegaly, whereas the spleen of  $Ripk3^{-/}Casp8^{\Delta E385/\Delta E385}$  recipients  
355 showed no difference (**Figure S6B**). In the peripheral blood, the  $Ripk3^{-/}Casp8^{\Delta E385/\Delta E385}$   
356 and  $Mlkl^{-/}Casp8^{\Delta E385/\Delta E385}$  recipients showed leucopenia and deficiency in every WBC  
357 subset (**Figure 6D**), while the red blood cells, platelets, and hemoglobin levels showed  
358 a minor decrease (**Figure S6C**). Consistently, lymphopenia was recapitulated in the  
359  $Ripk3^{-/}Casp8^{\Delta E385/\Delta E385}$  and  $Mlkl^{-/}Casp8^{\Delta E385/\Delta E385}$  recipients characterized by CD8<sup>+</sup> T  
360 cell deficiency in blood and decreased B cells, T cells, and their subsets in the spleen,  
361 bone marrow, and blood (**Figures 6E, 6F and S6D**). Collectively, caspase-8 cleavage  
362 together with RIPK3 or MLKL suppresses the intrinsic lymphopenia of hematopoietic  
363 stem cells.  
364

365 **Discussion**

366 Caspase-8 is a key regulator of apoptosis and necroptosis, as well as the inflammatory  
367 response through its dimerization and enzymatic activity<sup>1, 5, 16</sup>. The auto-cleavage  
368 activity of Caspase-8 has also been shown to be involved in mediating apoptosis and  
369 regulating inflammation<sup>13</sup>.

370 In this study, we demonstrated that CASP8( $\Delta$ E385) not only compromised Fas-induced  
371 apoptosis and switched TNF- $\alpha$  induced apoptosis to necroptosis but also promoted  
372 necroptosis both *in vitro* and *in vivo*. However, in contrast to the embryonic lethality  
373 observed in caspase-8 deficient<sup>49</sup> or with catalytically inactive caspase-8 mice<sup>6, 8</sup>,  
374 *Casp8* <sup>$\Delta$ E385/ $\Delta$ E385</sup> mice survived normally, suggesting that primarily caspase-8 catalytic  
375 activity rather than caspase-8 cleavage contributes to the suppression of RIPK3-MLKL  
376 mediating necroptosis during embryo development.

377 In the current study, we observed that caspase-8 cleavage between the large and small  
378 subunits was increased under TNF- $\alpha$ /Smac/zVAD (**Figure 1B**), which is consistent with  
379 results from TNF- $\alpha$  plus zVAD stimulation in previous studies<sup>69, 70</sup>. It has also been  
380 suggested that pro-caspase-8 and activated caspase-8 have divergent substrate  
381 specificities<sup>71, 72</sup>, and the substrate specificities of procaspase-8 change when it  
382 heterodimerizes with cFLIP<sub>L</sub> in complex II<sup>42</sup>. It has also been shown that Z-VAD-FMK  
383 is less efficacious at inhibiting the caspase-8 homodimer than the caspase-8/cFLIP<sub>L</sub>  
384 heterodimer<sup>73</sup>. Thus, one possible explanation is that zVAD promotes complex II  
385 formation, but its ability to inhibit the catalytic activity of pro-caspase-8 is not as  
386 efficacious as to inhibit the activated caspase-8, which contributes to more caspase-8  
387 auto-processing.

388 Earlier studies have demonstrated that perinatal death in *Ripk1*<sup>-/-</sup> mice is prevented by  
389 co-ablation of FADD/caspase-8 dependent apoptosis and RIPK3/MLKL dependent  
390 necroptosis<sup>67, 68</sup>. Here, we generated *Ripk1*<sup>-/-</sup>*Ripk3*<sup>-/-</sup>*Casp8* <sup>$\Delta$ E385/ $\Delta$ E385</sup> mice that died  
391 around two weeks to strongly prolong the survival of *Ripk1*<sup>-/-</sup> *Ripk3*<sup>-/-</sup> mice. During the  
392 manuscript preparation, a recent paper reported that *Fadd*<sup>-/-</sup>*Mlkl*<sup>-/-</sup>*Casp8*<sup>DA/DA</sup> also died  
393 around two weeks after birth due to the exacerbation of inflammation<sup>13</sup>, suggesting that  
394 caspase-8 exhibits a FADD-independent inflammatory function that is inhibited by

395 caspase-8 cleavage. Therefore, whether lethal inflammation in *Ripk1<sup>-/-</sup>Ripk3<sup>-/-</sup>*  
396 *Casp8<sup>ΔE385/ΔE385</sup>* mice can be prevented by the additional ablation of caspase-1 as *Fadd<sup>-/-</sup>*  
397 *Mkl<sup>-/-</sup>Casp8<sup>DA/DA</sup>* mice remain to be determined.

398 The role of caspase-8, RIPK3, and MLKL in non-programmed cell death has been  
399 reported to regulate lymphadenopathy<sup>11</sup>, lymphoproliferation<sup>25</sup> and  
400 immunodeficiency<sup>26, 33</sup>. We demonstrated an unexpected role of caspase-8 auto-  
401 cleavage cooperating with RIPK3 or MLKL and RIPK1 in lymphopenia regulation.  
402 Unlike *Casp8<sup>-/-</sup>Ripk3<sup>-/-</sup>* and *Casp8<sup>-/-</sup>Mkl<sup>-/-</sup>* mice, which resemble the human ALPS<sup>11</sup> and  
403 impair cytokine response<sup>33</sup>, we found that *Casp8<sup>ΔE385/ΔE385</sup>Ripk3<sup>-/-</sup>* and  
404 *Casp8<sup>ΔE385/ΔE385</sup>Mkl<sup>-/-</sup>* mice develop hematopoietic cell-intrinsic lymphopenia and  
405 myeloid bias (**Figures 5, 6**). We observed that the circulating mature B cells  
406 (B220<sup>+</sup>IgM<sup>+</sup>) and T cells in the peripheral blood and spleen of *Casp8<sup>ΔE385/ΔE385</sup>Ripk3<sup>-/-</sup>*  
407 and *Casp8<sup>ΔE385/ΔE385</sup>Mkl<sup>-/-</sup>* mice were dramatically decreased. This can be explained by  
408 decreased immature and mature B cells and T cells in the bone marrow (**Figures 5B-**  
409 **5E**). Moreover, Lymphopenia and myeloid bias in *Ripk3<sup>-/-</sup>Casp8<sup>ΔE385/ΔE385</sup>* mice were  
410 largely suppressed in *Ripk1<sup>+/-</sup>Ripk3<sup>-/-</sup>Casp8<sup>ΔE385/ΔE385</sup>* mice but not in  
411 *Ripk1<sup>K45A/K45A</sup>Ripk3<sup>-/-</sup>Casp8<sup>ΔE385/ΔE385</sup>* mice, revealing a previously unknown role of the  
412 dosage of RIPK1 instead of RIPK1 kinase activity administered to the mice in  
413 maintaining immune cell homeostasis in *Ripk3<sup>-/-</sup>Casp8<sup>ΔE385/ΔE385</sup>* mice.

414 In this study, we identified the phenotypes of *Casp8<sup>ΔE385/ΔE385</sup>* mice which resemble  
415 those of the *Casp8<sup>DA/DA</sup>* mice from a recent study<sup>13</sup>. Moreover, we also confirmed the  
416 enzymatic activity of CASP8(ΔE385) by examining caspase-3 cleavage in thymocytes  
417 with FasL treatment<sup>46</sup>. We found that *Casp8<sup>ΔE385/ΔE385</sup>* thymocytes showed comparable  
418 level of caspase-3 cleavage and cell death to that in *Casp8<sup>D387A/D387A</sup>* thymocytes after  
419 FasL treatment (**Figure 2A and S2A**), which indicated CASP8(ΔE385) has comparable  
420 enzymatic activity as caspase-8(D387A)<sup>46</sup>. However, we still cannot exclude the  
421 possibility that deletion of one amino acid in caspase-8 alters other caspase-8-mediated  
422 cellular signaling, therefore, whether E385 deletion influences other functions of  
423 caspase-8, in addition to its auto-cleavage, needs to be investigated further.

424 In summary, caspase-8 auto-cleavage plays an important role in regulating cell death

425 and immune cell homeostasis, that is, mediating apoptosis, suppressing necroptosis, and  
426 protecting from lymphopenia (**Figure S7**). Although CASP8( $\Delta$ E385) is sufficient to  
427 suppress necroptosis during embryonic development, CASP8( $\Delta$ E385) can induce  
428 excessive necroptosis by switching apoptosis to necroptosis and promoting complex II  
429 assembly and stabilization. Accordingly, *Casp8* <sup>$\Delta$ E385/ $\Delta$ E385</sup> mice are strongly sensitized  
430 to TNF- $\alpha$  induced necroptosis *in vivo*. Additionally, *Casp8* <sup>$\Delta$ E385/ $\Delta$ E385</sup>*Ripk3*<sup>-/-</sup> and  
431 *Casp8* <sup>$\Delta$ E385/ $\Delta$ E385</sup>*Mkl1*<sup>-/-</sup> mice develop severe lymphopenia that can be prevented by  
432 reducing the RIPK1 dosage by half, not by RIPK1 kinase inactive mutant. This  
433 indicates that caspase-8 cleavage cooperating RIPK3/MLKL to regulate RIPK1  
434 scaffold-dependent but RIPK1 kinase-independent function contributes to the  
435 maintenance of immune cell homeostasis. The exact signaling pathway and mechanism  
436 require further investigation.

437

438

439

440

441

442

443

444

445

446 **Materials and Methods**

447 **Mice**

448 All mice utilized in this study were C57BL/6 background and housed in a specific  
449 pathogen-free (SPF) facility. Both male and female mice were used in this study. For  
450 all studies mice were age- and sex-matched. *Ripk1*<sup>+/-</sup>, *Ripk3*<sup>-/-</sup>, *Ripk1*<sup>K45A/K45A</sup> and *Mlkl*<sup>-/-</sup>  
451 mouse lines have been described previously<sup>74,75</sup>. *Casp8*<sup>ΔE385/ΔE385</sup> mice were generated  
452 by CRISPR-Cas9 mutation system (Bioray Laboratories Inc., Shanghai, China). Three  
453 adjacent nucleotides AAG was removed in the exon 8 of the *Casp8* gene locus resulted  
454 in the deletion of Glutamic acid (Glu, E) in 385 position of caspase-8 protein sequence.  
455 The *Casp8* (ID: 12370) gene region corresponds to genomic position chr1: 58844689-  
456 58844691. *Casp8*<sup>ΔE385/ΔE385</sup> mice genotyping primers: 5'-  
457 CAGAGGCTCTGAGTAAGACC-3' and 5'-CTGAGGACATCTTCCCTCAG-3'  
458 amplified 506bp DNA fragments for sequencing. Additional information is provided  
459 upon request. Animal experiments were conducted in accordance with the guidelines  
460 of the Institutional Animal Care and Use Committee of the Institute of Nutrition and  
461 Health, Shanghai Institutes for Biological Sciences, University of Chinese Academy of  
462 Sciences.

463 **Isolation and culture of thymocytes, mouse dermal fibroblasts (MDFs) and bone**  
464 **marrow derived macrophages (BMDMs)**

465 Both male and female mice were used to generate MDFs and BMDMs. MDFs were  
466 separated from the skin of newborn mice (P0-P1), and cultured in DMEM medium  
467 (SH30243.01B, HyClone) supplemented with 10% of Fetal Bovine Serum (04-001-1A,  
468 Bioind) and 1% of penicillin/streptomycin (15140122, Gibco). BMDMs were isolated  
469 from the bone marrow of mouse femurs and tibias followed by inducing to differentiate  
470 *in vitro*. Bone marrow cells were cultured for 7 days in RPMI-1640 medium  
471 (SH30809.01B, HyClone) containing 10% of Fetal Bovine Serum (04-001-1A, Bioind)  
472 and 1% of penicillin/streptomycin (15140122, Gibco) and 50 ng/ml M-CSF (AF-315-  
473 02, PeproTech), and medium was refreshed each 3 days. Cells were cultivated at 37°C  
474 with 5% CO<sub>2</sub>.

475 **Cell death stimulation and Cell survival assay**

476 MDFs were plated in 96-well plates 12 hours before stimulation at a concentration of  
477  $1 \times 10^4$  cells per well. For TNF- $\alpha$  induced apoptosis and necroptosis stimulation, MDFs  
478 were treated with TNF- $\alpha$  (20 ng/ml) (T) for 10 hours, TNF- $\alpha$  (20 ng/ml)+Smac (1  $\mu$ M)  
479 (TS), TNF- $\alpha$ +Smac +Necrostatin-1 (30  $\mu$ M) (TSN), TNF- $\alpha$ +Smac+zVAD (20  $\mu$ M)  
480 (TSZ), TNF- $\alpha$ +Smac+zVAD+Nec-1 (TSZN) for 6.45 hours, TNF- $\alpha$ (20 ng/ml)+CHX  
481 (20  $\mu$ g/ml) (TC), TNF- $\alpha$ +CHX+Necrostatin-1 (30  $\mu$ M)(TCN), TNF- $\alpha$ +CHX+zVAD  
482 (20  $\mu$ M) (TCZ), and TNF- $\alpha$ +CHX+zVAD+Nec-1 (TCZN) for 4.45 hours. For GSK'872  
483 induced apoptosis, MDFs were treated with GSK'872 in concentration of 3  $\mu$ M, 6  $\mu$ M  
484 and 10  $\mu$ M for 10 hours respectively.

485 BMDMs were plated in 96-well plates 12 hours before stimulation at a concentration  
486 of  $2 \times 10^4$  cells per well. For TNF- $\alpha$ , LPS and poly(I:C) induced apoptosis and  
487 necroptosis stimulation, BMDMs were treated with TNF- $\alpha$  (20 ng/ml)+Smac (1  
488  $\mu$ M)+zVAD (20  $\mu$ M) (TSZ), TNF- $\alpha$ +Smac+zVAD+Nec-1 (30  $\mu$ M) (TSZN), LPS (100  
489 ng/ml) (L), LPS (100 ng/ml)+zVAD (20  $\mu$ M) (LZ), LPS+zVAD+Nec-1 (30  $\mu$ M) (LZN),  
490 poly(I:C) (100  $\mu$ g/ml) (P), poly(I:C) (100  $\mu$ g/ml)+zVAD (20  $\mu$ M) (PZ),  
491 poly(I:C)+zVAD+Nec-1 (30  $\mu$ M) (PZN) for 3 hours.

492 Thymocytes were plated in 96-well plates 12 hours before stimulation at a concentration  
493 of  $4 \times 10^4$  cells per well. For Fas-induced apoptosis, thymocytes were treated with anti-  
494 Fas antibody (Jo-2, 100ng/ml)+CHX (30  $\mu$ g/ml) (FC) for 12h, 15h, 18h and 21h  
495 respectively.

496 Cell survival was determined using the CellTiter-Glo Luminescent Cell Viability Assay  
497 kit (G7572, Promega) and the luminescence was recorded with a microplate  
498 luminometer (5300170, Thermo Scientific).

499 **Cell death Analysis by Western blot (WB) and complex II immunoprecipitation**

500 MDFs were plated in 6-cm dishes 12 hours before stimulation at a concentration of  
501  $2 \times 10^6$  cells per dish. For TNF- $\alpha$  induced apoptosis and necroptosis stimulation, MDFs  
502 were treated with TNF- $\alpha$  (40 ng/ml)+Smac (2  $\mu$ M) (TS), TNF- $\alpha$  (20 ng/ml)+Smac (1  
503  $\mu$ M)+zVAD (20  $\mu$ M) (TSZ), TNF- $\alpha$  (40 ng/ml)+CHX (40  $\mu$ g/ml) (TC), TNF- $\alpha$  (40  
504 ng/ml)+CHX (40  $\mu$ g/ml) +zVAD (20  $\mu$ M) (TCZ) for the indicated time. For GSK'872

505 induced apoptosis, MDFs were treated with GSK'872 (20  $\mu$ M) for the indicated time.  
506 BMDMs were plated in 6-cm dishes 12 hours before stimulation at a concentration of  
507  $2 \times 10^6$  cells per dish. For LPS induced necroptosis stimulation, BMDMs were treated  
508 with LPS (200 ng/ml) (L), LPS+zVAD (40  $\mu$ M) (LZ) for 6 hours.  
509 Cells were harvested after stimulation, washed with PBS and lysates with RIPA lysis  
510 buffer (50 mM Tris-HCl (pH7.4), 150 mM NaCl, 2 mM EDTA, 1% NP-40, 0.1% SDS,  
511 Protease inhibitor Cocktail (4693132001, Roche), Phosphatase inhibitor Cocktail 3  
512 (P0044-1ML, Sigma)) for 30-45 minutes on ice. The lysates were centrifuged for  
513 20 min at 13,200g, 4°C, quantified by BCA kit (P0010S, Beyotime) and then mixed  
514 with SDS sample buffer (250 mM Tris-Cl (PH 6.8), 10% SDS, 30% Glycerol, 5%  $\beta$ -  
515 mercapitaethanol, 0.02% Bromophenol blue) followed by boiling at 100°C for 10 min.  
516 The proteins were separated by SDS-PAGE, and then transferred to PVDF membrane  
517 (IPVH00010, Millipore) at 110v for 3h. Membranes were blocked with 5% skimmed  
518 milk in PBST 0.1% for 1h. Membranes were washed three times with PBST 0.1% for  
519 7 minutes. Membranes were incubated in PBST 0.1% containing primary antibodies at  
520 4°C overnight. The proteins were detected by chemiluminescent substrate (34080,  
521 Thermo Scientific) using Tanon 5200 Multi Luminescent Imaging Workstation (Tanon).  
522 For mouse tissue protein extraction, the indicated tissues were ground into powder by  
523 pestle and mortar with liquid nitrogen, and the protein was extracted with RIPA lysis  
524 buffer followed by centrifugation, quantification, SDS-PAGE and transmembrane as  
525 above. For GSK'872 induced apoptosis detection in **Figure 2B**, the MDFs were  
526 harvested by RIPA lysis buffer with 6M Urea.  
527 For complex II immunoprecipitation (IP), cells were lysed with lysis buffer (20 mM  
528 Tris-HCl (pH 7.5), 1% Triton X-100, 0.2% NP-40, 120mM NaCl, 0.27M sucrose, 1mM  
529 EDTA, 1mM EGTA, 50mM NaF, 10mM  $\beta$ -glycerophosphate, 5mM sodium  
530 pyrophosphate, 2mM PMSF, Protease inhibitor Cocktail (4693132001, Roche),  
531 Phosphatase inhibitor Cocktail 3 (P0044-1ML, Sigma)). Cell lysates were overnight  
532 incubated with 1  $\mu$ g of anti-RIPK1 (610459, BD Biosciences) at 4°C followed by 4h  
533 incubation with 50 $\mu$ l of Protein A agarose (16-125, Millipore). Beads were washed and  
534 proteins were eluted with 2X SDS sample buffer followed by boiling at 100°C for



535 10 min.

536 The primary antibodies used for western blot: anti-RIPK1 (610459, BD Biosciences),  
537 anti-phosphorylated RIPK1 (31122S, Cell Signaling Technology), anti-RIPK3 (2283,  
538 Prosci), anti-phosphorylated RIPK3 (ab195117, Abcam), anti-caspase-8 (ALX-804-  
539 447-C100, Enzo Life Science), anti-cleaved caspase-8 (9429S, Cell Signaling  
540 Technology), anti-caspase-8 (4927S, Cell Signaling Technology), anti-MLKL  
541 (AP14272b, Abgent), anti-phosphorylated MLKL (ab196436, Abcam), anti-FADD  
542 (ab124812, Abcam), anti-PARP (9542S, Cell Signaling Technology), anti-caspase-3  
543 (9662S, Cell Signaling Technology), anti-cleaved caspase-3 (9661S, Cell Signaling  
544 Technology), anti- $\beta$ -actin (3779, Prosci), anti-GAPDH (G9545, Sigma).

545 **Anti-Fas induced thymocytes apoptosis analyzed by Flow cytometry and western**  
546 **blot**

547 Both male and female mice were used to harvest thymocytes. Thymocytes were  
548 harvested from wild-type and *Casp8* <sup>$\Delta E385/\Delta E385$</sup>  mice of 1-month old, and cultured in  
549 DMEM medium (SH30243.01B, HyClone) supplemented with 10% of heat-inactivated  
550 Fetal Bovine Serum (04-001-1A, Biointd), 1% of penicillin/streptomycin (15140122,  
551 Gibco), 200 mM L-glutamine (25030-081, Gibco), 1X MEM non-essential amino acids  
552 (NEAA) (11140-050, Gibco) and 55 mM 2-Mercaptoethanol (M6250, Sigma). Cells  
553 were cultivated at 37°C with 5% CO<sub>2</sub>.

554 For flowcytometry analysis, thymocytes were plated in 6-well plates followed by  
555 stimulation at a concentration of  $1 \times 10^6$  cells per well, and thymocytes were treated with  
556 2 $\mu$ g/ml anti-Fas antibody (Jo-2, 554255, BD) for 24 hours followed by staining with  
557 FITC-Annexin V and PI utilizing apoptosis detection kit (C1062L, Beyotime). After  
558 staining, cells were analyzed in cytoflex S flow cytometer (cytoflex S, Beckman  
559 Coulter). All analyses were performed using CytExpert software (CytExpert, Beckman  
560 Coulter, Inc.).

561 For western blot analysis, thymocytes were plated in 10-cm dish followed by  
562 stimulation at a concentration of  $2 \times 10^7$  cells per well, and thymocytes were treated with  
563 1 $\mu$ g/ml anti-Fas antibody (Jo-2, 554255, BD) for the indicated time followed by

564 washing with 1XPBS and lysates with RIPA lysis buffer (50 mM Tris-HCl (pH7.4), 150  
565 mM NaCl, 2 mM EDTA, 1% NP-40, 0.1% SDS, Protease inhibitor Cocktail  
566 (4693132001, Roche), Phosphatase inhibitor Cocktail 3 (P0044-1ML, Sigma)).

#### 567 **MLKL oligomerization detection**

568 MDFs were cultured in 6-cm dishes at a concentration of  $2 \times 10^6$  cells per dish and  
569 challenged by TNF- $\alpha$  (20 ng/ml) +Smac (1  $\mu$ M) +zVAD (20  $\mu$ M) for the indicated time.  
570 MDFs were harvested at different time points and lysed with non-reducing sample  
571 buffer (125 mM Tris-Cl (PH 6.8), 20% Glycerol, 0.02% Bromophenol blue)  
572 immediately. Total cell lysates were separated using SDS-PAGE, transferred to PVDF  
573 membrane (IPVH00010, Millipore), and detected with the indicated antibodies.

#### 574 **Anti-Fas induced hepatocellular apoptosis and analysis of the serum and liver** 575 **damage**

576 The wild-type and *Casp8*<sup>AE385/AE385</sup> mice of 8- to 12-week old were injected  
577 intravenously with anti-Fas antibody (Jo-2, 554255, BD) in the dose of 0.5  $\mu$ g/g and  
578 their survival time was followed for 20 hours. At the indicated times, their livers and  
579 peripheral blood were harvested followed by processing for histological analysis,  
580 western blot and analyzing the alanine transaminase (ALT) and aspartate transaminase  
581 (AST) levels in serum. To analyze the ALT and AST levels in serum, the peripheral  
582 blood of the indicated mice were collected in anticoagulation tube followed by  
583 centrifugation at 7000g, 4°C for 30 minutes. The serum was collected to detect ALT  
584 (3040280, Shanghai Shensuo UNF Medical Diagnostic Articles Co.) and AST  
585 (3050280, Shanghai Shensuo UNF Medical Diagnostic Articles Co.) level utilizing the  
586 kit.

#### 587 **TNF- $\alpha$ induced mice toxicity and analysis of the body temperature**

588 The WT, *Casp8*<sup>AE385/AE385</sup>, *Casp8*<sup>AE385/AE385</sup>*Ripk3*<sup>-/-</sup> and *Casp8*<sup>AE385/AE385</sup>*Ripk1*<sup>K45A/K45A</sup>  
589 mice of 8- to 16-week old were injected intravenously with TNF- $\alpha$  (CRT192C, Cell  
590 sciences and obtained from Dr. Yi Zhang at Shanghai Institute of Nutrition and Health,  
591 CAS) in the dose of 7  $\mu$ g each mouse and their body temperature was measured every  
592 2 hours until the twelfth hour after injection.

#### 593 **Flow cytometry analyses**

594 Lymphocytes were isolated from the peripheral blood, spleen, bone marrow and lymph  
595 nodes of the indicated mice. Total cell numbers were counted using counting slides (SD-  
596 100, Nexcelom) in Cellometer Mini Automated Cell Counter (Nexcelom). Surface  
597 antigens were stained with indicated conjugated primary antibodies in the staining  
598 buffer (1×PBS, 3% BSA, 1 mM EDTA, 0.1%NaN<sub>3</sub>) at 4°C for 30 minutes. Antibodies  
599 used are as follows: FITC anti-CD3 (11-0031-82, eBioscience), APC Cy7 anti-CD4  
600 (552051, BD Biosciences), PerCp anti-CD8 (100732, Biolegend), PE anti-B220 (12-  
601 0452-83, eBioscience), APC anti-B220 (17-0452-83, eBioscience), APC anti-CD11b  
602 (17-0112-83, eBioscience), Brilliant Violet 421 anti-CD11b (562605, BD Biosciences),  
603 PE Cy7 anti-CD19 (25-0193-82, eBioscience), FITC anti-IgM (115-097-020, Jackson  
604 Laboratories), FITC anti-F4/80 (11-4801-85, eBioscience) were used for flow  
605 cytometry analysis in this study. After staining, cells were washed once with 1XPBS  
606 and immediately analyzed by in cytoflex S flow cytometer (cytoflex S, Beckman  
607 Coulter). All analyses were performed using CytExpert software (CytExpert, Beckman  
608 Coulter, Inc.).

#### 609 **Analyses of CD11b<sup>+</sup> F4/80<sup>+</sup> peritoneal macrophages *in vivo***

610 Wild-type, *Casp8*<sup>ΔE385/ΔE385</sup> and *Ripk1*<sup>+/-</sup>*Ripk3*<sup>-/-</sup>*Casp8*<sup>ΔE385/ΔE385</sup> mice were injected  
611 intraperitoneally with vehicle or zVAD (20 mg/kg) 1h before intraperitoneal injection  
612 with PBS or LPS (10 mg/kg). Animals were killed at twenty fourth hour after the first  
613 injection, resident peritoneal cells were harvested by lavage of the peritoneal cavity  
614 with 8 ml PBS. CD11b<sup>+</sup>F4/80<sup>+</sup> peritoneal macrophages were analyzed by flow  
615 cytometry.

#### 616 **Bone marrow transplantation Assay**

617 All of the recipient mice were wild type with C57BL/6 background, which received 11  
618 Gy of total body irradiation in a split dose (550 rads) with 4-hour rest between doses  
619 using a Cesium-137 irradiator. Irradiated recipients were reconstituted by intravenous  
620 injection of 2.5X10<sup>6</sup> bone marrow cells from femurs and tibias of the 6-week old  
621 indicated genotype mice. Recipients were sacrificed at fourth months after  
622 reconstitution.

#### 623 **Whole blood count analysis**

624 The whole peripheral blood of the indicated mice was collected in anticoagulation tube  
625 followed by diluting in EDTA buffer (0.5 M EDTA pH8.0) at a ratio of 1:1, and then  
626 diluted peripheral blood was analyzed on an auto hematology analyzer (BC-2800Vet,  
627 Mindray).

#### 628 **Quantification and Statistical Analysis**

629 Please refer to the figure legends for description of sample size (n) and statistical  
630 significance. Data were analyzed with GraphPad Prism 8.0 software using the two-  
631 tailed unpaired Student t test or two-sided Log-rank (Mantel-Cox) test. Bars,  
632 mean±standard deviation (mean±SD). Differences were considered statistically  
633 significant when the *P* value was less than 0.05, where \*\*\*\**p* < 0.0001, \*\*\**p* < 0.001,  
634 \*\**p* < 0.01, \**p* < 0.05, ns, not significant.

635

#### 636 **DATA AVAILABILITY**

637 The authors declare that all data supporting the findings of this study are present in the  
638 paper and/or the Supplementary Materials.

639

640 **References**

- 641 1. Kesavardhana S, Malireddi RKS, Kanneganti TD. Caspases in Cell Death, Inflammation, and  
642 Pyroptosis. *Annu Rev Immunol* 2020, **38**: 567-595.  
643
- 644 2. Lavrik IN, Golks A, Krammer PH. Caspases: pharmacological manipulation of cell death. *J*  
645 *Clin Invest* 2005, **115**(10): 2665-2672.  
646
- 647 3. Salvesen GS, Walsh CM. Functions of caspase 8: the identified and the mysterious. *Semin*  
648 *Immunol* 2014, **26**(3): 246-252.  
649
- 650 4. Tummers B, Green DR. Caspase-8: regulating life and death. *Immunol Rev* 2017, **277**(1):  
651 76-89.  
652
- 653 5. Van Opdenbosch N, Lamkanfi M. Caspases in Cell Death, Inflammation, and Disease.  
654 *Immunity* 2019, **50**(6): 1352-1364.  
655
- 656 6. Fritsch M, Gunther SD, Schwarzer R, Albert MC, Schorn F, Werthenbach JP, *et al.* Caspase-  
657 8 is the molecular switch for apoptosis, necroptosis and pyroptosis. *Nature* 2019,  
658 **575**(7784): 683-687.  
659
- 660 7. Newton K, Wickliffe KE, Dugger DL, Maltzman A, Roose-Girma M, Dohse M, *et al.* Cleavage  
661 of RIPK1 by caspase-8 is crucial for limiting apoptosis and necroptosis. *Nature* 2019,  
662 **574**(7778): 428-431.  
663
- 664 8. Newton K, Wickliffe KE, Maltzman A, Dugger DL, Reja R, Zhang Y, *et al.* Activity of caspase-  
665 8 determines plasticity between cell death pathways. *Nature* 2019, **575**(7784): 679-682.  
666
- 667 9. Kaiser WJ, Upton JW, Long AB, Livingston-Rosanoff D, Daley-Bauer LP, Hakem R, *et al.*  
668 RIP3 mediates the embryonic lethality of caspase-8-deficient mice. *Nature* 2011,  
669 **471**(7338): 368-372.  
670
- 671 10. Oberst A, Dillon CP, Weinlich R, McCormick LL, Fitzgerald P, Pop C, *et al.* Catalytic activity  
672 of the caspase-8-FLIP(L) complex inhibits RIPK3-dependent necrosis. *Nature* 2011,  
673 **471**(7338): 363-367.  
674
- 675 11. Alvarez-Diaz S, Dillon CP, Lalaoui N, Tanzer MC, Rodriguez DA, Lin A, *et al.* The  
676 Pseudokinase MLKL and the Kinase RIPK3 Have Distinct Roles in Autoimmune Disease  
677 Caused by Loss of Death-Receptor-Induced Apoptosis. *Immunity* 2016, **45**(3): 513-526.  
678
- 679 12. Kang S, Fernandes-Alnemri T, Rogers C, Mayes L, Wang Y, Dillon C, *et al.* Caspase-8  
680 scaffolding function and MLKL regulate NLRP3 inflammasome activation downstream of  
681 TLR3. *Nat Commun* 2015, **6**: 7515.  
682

- 683 13. Tummers B, Mari L, Guy CS, Heckmann BL, Rodriguez DA, Ruhl S, *et al.* Caspase-8-  
684 Dependent Inflammatory Responses Are Controlled by Its Adaptor, FADD, and  
685 Necroptosis. *Immunity* 2020.  
686
- 687 14. Henry CM, Martin SJ. Caspase-8 Acts in a Non-enzymatic Role as a Scaffold for Assembly  
688 of a Pro-inflammatory "FADDosome" Complex upon TRAIL Stimulation. *Mol Cell* 2017,  
689 **65**(4): 715-729 e715.  
690
- 691 15. Kang TB, Yang SH, Toth B, Kovalenko A, Wallach D. Caspase-8 blocks kinase RIPK3-  
692 mediated activation of the NLRP3 inflammasome. *Immunity* 2013, **38**(1): 27-40.  
693
- 694 16. Monie TP, Bryant CE. Caspase-8 functions as a key mediator of inflammation and pro-IL-  
695 1beta processing via both canonical and non-canonical pathways. *Immunol Rev* 2015,  
696 **265**(1): 181-193.  
697
- 698 17. Gunther C, Buchen B, He GW, Hornef M, Torow N, Neumann H, *et al.* Caspase-8 controls  
699 the gut response to microbial challenges by Tnf-alpha-dependent and independent  
700 pathways. *Gut* 2015, **64**(4): 601-610.  
701
- 702 18. Gunther C, Martini E, Wittkopf N, Amann K, Weigmann B, Neumann H, *et al.* Caspase-8  
703 regulates TNF-alpha-induced epithelial necroptosis and terminal ileitis. *Nature* 2011,  
704 **477**(7364): 335-339.  
705
- 706 19. Weinlich R, Oberst A, Dillon CP, Janke LJ, Milasta S, Lukens JR, *et al.* Protective roles for  
707 caspase-8 and cFLIP in adult homeostasis. *Cell Rep* 2013, **5**(2): 340-348.  
708
- 709 20. Schwarzer R, Jiao H, Wachsmuth L, Tresch A, Pasparakis M. FADD and Caspase-8 Regulate  
710 Gut Homeostasis and Inflammation by Controlling MLKL- and GSDMD-Mediated Death  
711 of Intestinal Epithelial Cells. *Immunity* 2020.  
712
- 713 21. Kovalenko A, Kim JC, Kang TB, Rajput A, Bogdanov K, Dittrich-Breiholz O, *et al.* Caspase-  
714 8 deficiency in epidermal keratinocytes triggers an inflammatory skin disease. *J Exp Med*  
715 2009, **206**(10): 2161-2177.  
716
- 717 22. Newton K, Dugger DL, Wickliffe KE, Kapoor N, de Almagro MC, Vucic D, *et al.* Activity of  
718 protein kinase RIPK3 determines whether cells die by necroptosis or apoptosis. *Science*  
719 2014, **343**(6177): 1357-1360.  
720
- 721 23. Yang ZH, Wu XN, He P, Wang X, Wu J, Ai T, *et al.* A Non-canonical PDK1-RSK Signal  
722 Diminishes Pro-caspase-8-Mediated Necroptosis Blockade. *Mol Cell* 2020.  
723
- 724 24. Mandal P, Feng Y, Lyons JD, Berger SB, Otani S, DeLaney A, *et al.* Caspase-8 Collaborates  
725 with Caspase-11 to Drive Tissue Damage and Execution of Endotoxic Shock. *Immunity*  
726 2018, **49**(1): 42-55 e46.

727

728 25. Kanderova V, Grombirikova H, Zentsova I, Reblova K, Klocperk A, Fejtkova M, *et al.*  
729 Lymphoproliferation, immunodeficiency and early-onset inflammatory bowel disease  
730 associated with a novel mutation in Caspase 8. *Haematologica* 2019, **104**(1): e32-e34.

731

732 26. Chun. HJ, Zheng. L, Ahmad. M, Wang. J, Speirs. CK, Siegel. RM, *et al.* Pleiotropic defects  
733 in lymphocyte activation caused by caspase-8 mutations lead to human  
734 immunodeficiency. *Nature* 2002, **419**: 395-399.

735

736 27. Niemela J, Kuehn HS, Kelly C, Zhang M, Davies J, Melendez J, *et al.* Caspase-8 Deficiency  
737 Presenting as Late-Onset Multi-Organ Lymphocytic Infiltration with Granulomas in two  
738 Adult Siblings. *J Clin Immunol* 2015, **35**(4): 348-355.

739

740 28. LA OR, Tai L, Lee L, Kruse EA, Grabow S, Fairlie WD, *et al.* Membrane-bound Fas ligand  
741 only is essential for Fas-induced apoptosis. *Nature* 2009, **461**(7264): 659-663.

742

743 29. Watanabe-Fukunaga R, Brannan CI, Copeland NG, Jenkins NA, Nagata S.  
744 Lymphoproliferation disorder in mice explained by defects in Fas antigen that mediates  
745 apoptosis. *Nature* 1992, **356**(6367): 314-317.

746

747 30. Watanabe-Fukunaga R, Brannan CI, Copeland NG, Jenkins NA, Nagata S. Pillars article:  
748 lymphoproliferation disorder in mice explained by defects in Fas antigen that mediates  
749 apoptosis. 1992. *J Immunol* 2012, **189**(11): 5101-5104.

750

751 31. Shah S, Wu E, Rao VK, Tarrant TK. Autoimmune lymphoproliferative syndrome: an update  
752 and review of the literature. *Curr Allergy Asthma Rep* 2014, **14**(9): 462.

753

754 32. Rieux-Laucat F, Le Deist F, Hivroz C, Roberts IA, Debatin KM, Fischer A, *et al.* Mutations in  
755 Fas associated with human lymphoproliferative syndrome and autoimmunity. *Science*  
756 1995, **268**(5215): 1347-1349.

757

758 33. Gitlin AD, Heger K, Schubert AF, Reja R, Yan D, Pham VC, *et al.* Integration of innate  
759 immune signaling by caspase-8 cleavage of N4BP1. *Nature* 2020.

760

761 34. Lehle AS, Farin HF, Marquardt B, Michels BE, Magg T, Li Y, *et al.* Intestinal Inflammation  
762 and Dysregulated Immunity in Patients With Inherited Caspase-8 Deficiency.  
763 *Gastroenterology* 2019, **156**(1): 275-278.

764

765 35. Boatright KM, Renatus M, Scott FL, Sperandio S, Shin H, Pedersen IM, *et al.* A unified  
766 model for apical caspase activation. *Mol Cell* 2003, **11**(2): 529-541.

767

768 36. Donepudi M, Mac Sweeney A, Briand C, Grutter MG. Insights into the regulatory  
769 mechanism for caspase-8 activation. *Mol Cell* 2003, **11**(2): 543-549.

770

- 771 37. Oberst A, Pop C, Tremblay AG, Blais V, Denault JB, Salvesen GS, *et al.* Inducible  
772 dimerization and inducible cleavage reveal a requirement for both processes in caspase-  
773 8 activation. *J Biol Chem* 2010, **285**(22): 16632-16642.  
774
- 775 38. Muzio M, Stockwell BR, Stennicke HR, Salvesen GS, Dixit VM. An induced proximity model  
776 for caspase-8 activation. *J Biol Chem* 1998, **273**(5): 2926-2930.  
777
- 778 39. Salvesen GS, Dixit VM. Caspase activation: the induced-proximity model. *Proc Natl Acad*  
779 *Sci U S A* 1999, **96**(20): 10964-10967.  
780
- 781 40. Pop C, Fitzgerald P, Green DR, Salvesen GS. Role of proteolysis in caspase-8 activation  
782 and stabilization. *Biochemistry* 2007, **46**(14): 4398-4407.  
783
- 784 41. O'Donnell MA, Perez-Jimenez E, Oberst A, Ng A, Massoumi R, Xavier R, *et al.* Caspase 8  
785 inhibits programmed necrosis by processing CYLD. *Nat Cell Biol* 2011, **13**(12): 1437-1442.  
786
- 787 42. Pop C, Oberst A, Drag M, Van Raam BJ, Riedl SJ, Green DR, *et al.* FLIP(L) induces caspase  
788 8 activity in the absence of interdomain caspase 8 cleavage and alters substrate specificity.  
789 *Biochem J* 2011, **433**(3): 447-457.  
790
- 791 43. Lin Y, Devin A, Rodriguez Y, Liu ZG. Cleavage of the death domain kinase RIP by caspase-  
792 8 prompts TNF-induced apoptosis. *Genes Dev* 1999, **13**(19): 2514-2526.  
793
- 794 44. Feng S, Yang Y, Mei Y, Ma L, Zhu DE, Hoti N, *et al.* Cleavage of RIP3 inactivates its caspase-  
795 independent apoptosis pathway by removal of kinase domain. *Cell Signal* 2007, **19**(10):  
796 2056-2067.  
797
- 798 45. Pop C, Timmer J, Sperandio S, Salvesen GS. The apoptosome activates caspase-9 by  
799 dimerization. *Mol Cell* 2006, **22**(2): 269-275.  
800
- 801 46. Kang TB, Oh GS, Scandella E, Bolinger B, Ludewig B, Kovalenko A, *et al.* Mutation of a self-  
802 processing site in caspase-8 compromises its apoptotic but not its nonapoptotic functions  
803 in bacterial artificial chromosome-transgenic mice. *J Immunol* 2008, **181**(4): 2522-2532.  
804
- 805 47. Yao Z, Duan S, Hou D, Heese K, Wu M. Death effector domain DEDa, a self-cleaved  
806 product of caspase-8/Mch5, translocates to the nucleus by binding to ERK1/2 and  
807 upregulates procaspase-8 expression via a p53-dependent mechanism. *EMBO J* 2007,  
808 **26**(4): 1068-1080.  
809
- 810 48. Thornberry NA, Rano TA, Peterson EP, Rasper DM, Timkey T, Garcia-Calvo M, *et al.* A  
811 combinatorial approach defines specificities of members of the caspase family and  
812 granzyme B. Functional relationships established for key mediators of apoptosis. *J Biol*  
813 *Chem* 1997, **272**(29): 17907-17911.  
814



- 815 49. Varfolomeev EE, Schuchmann M, Luria V, Chiannikulchai N, Beckmann JS, Mett IL, *et al.*  
816 Targeted disruption of the mouse Caspase 8 gene ablates cell death induction by the TNF  
817 receptors, Fas/Apo1, and DR3 and is lethal prenatally. *Immunity* 1998, **9**(2): 267-276.  
818
- 819 50. Mandal P, Berger SB, Pillay S, Moriwaki K, Huang C, Guo H, *et al.* RIP3 induces apoptosis  
820 independent of pronecrotic kinase activity. *Mol Cell* 2014, **56**(4): 481-495.  
821
- 822 51. Orning P, Lien E. Multiple roles of caspase-8 in cell death, inflammation, and innate  
823 immunity. *J Leukoc Biol* 2020.  
824
- 825 52. He S, Wang L, Miao L, Wang T, Du F, Zhao L, *et al.* Receptor interacting protein kinase-3  
826 determines cellular necrotic response to TNF-alpha. *Cell* 2009, **137**(6): 1100-1111.  
827
- 828 53. Cho YS, Challa S, Moquin D, Genga R, Ray TD, Guildford M, *et al.* Phosphorylation-driven  
829 assembly of the RIP1-RIP3 complex regulates programmed necrosis and virus-induced  
830 inflammation. *Cell* 2009, **137**(6): 1112-1123.  
831
- 832 54. Zhang DW, Shao J, Lin J, Zhang N, Lu BJ, Lin SC, *et al.* RIP3, an energy metabolism  
833 regulator that switches TNF-induced cell death from apoptosis to necrosis. *Science* 2009,  
834 **325**(5938): 332-336.  
835
- 836 55. Sun L, Wang H, Wang Z, He S, Chen S, Liao D, *et al.* Mixed lineage kinase domain-like  
837 protein mediates necrosis signaling downstream of RIP3 kinase. *Cell* 2012, **148**(1-2): 213-  
838 227.  
839
- 840 56. Wang H, Sun L, Su L, Rizo J, Liu L, Wang LF, *et al.* Mixed lineage kinase domain-like protein  
841 MLKL causes necrotic membrane disruption upon phosphorylation by RIP3. *Mol Cell* 2014,  
842 **54**(1): 133-146.  
843
- 844 57. He S, Wang X. RIP kinases as modulators of inflammation and immunity. *Nat Immunol*  
845 2018, **19**(9): 912-922.  
846
- 847 58. Wang L, Du F, Wang X. TNF-alpha induces two distinct caspase-8 activation pathways.  
848 *Cell* 2008, **133**(4): 693-703.  
849
- 850 59. Micheau O, Tschopp J. Induction of TNF receptor I-mediated apoptosis via two sequential  
851 signaling complexes. *Cell* 2003, **114**(2): 181-190.  
852
- 853 60. Wilson NS, Dixit V, Ashkenazi A. Death receptor signal transducers: nodes of coordination  
854 in immune signaling networks. *Nat Immunol* 2009, **10**(4): 348-355.  
855
- 856 61. Zhao J, Jitkaew S, Cai Z, Choksi S, Li Q, Luo J, *et al.* Mixed lineage kinase domain-like is a  
857 key receptor interacting protein 3 downstream component of TNF-induced necrosis. *Proc*  
858 *Natl Acad Sci U S A* 2012, **109**(14): 5322-5327.

859

860 62. Dondelinger Y, Jouan-Lanhouet S, Divert T, Theatre E, Bertin J, Gough PJ, *et al.* NF-  
861 kappaB-Independent Role of IKKalpha/IKKbeta in Preventing RIPK1 Kinase-Dependent  
862 Apoptotic and Necroptotic Cell Death during TNF Signaling. *Mol Cell* 2015, **60**(1): 63-76.

863

864 63. Vanlangenakker N, Vanden Berghe T, Bogaert P, Laukens B, Zobel K, Deshayes K, *et al.*  
865 cIAP1 and TAK1 protect cells from TNF-induced necrosis by preventing RIP1/RIP3-  
866 dependent reactive oxygen species production. *Cell Death Differ* 2011, **18**(4): 656-665.

867

868 64. Dzedzic SA, Su Z, Jean Barrett V, Najafov A, Mookhtiar AK, Amin P, *et al.* ABIN-1 regulates  
869 RIPK1 activation by linking Met1 ubiquitylation with Lys63 deubiquitylation in TNF-RSC.  
870 *Nat Cell Biol* 2018, **20**(1): 58-68.

871

872 65. Feoktistova M, Geserick P, Kellert B, Dimitrova DP, Langlais C, Hupe M, *et al.* cIAPs block  
873 Ripoptosome formation, a RIP1/caspase-8 containing intracellular cell death complex  
874 differentially regulated by cFLIP isoforms. *Mol Cell* 2011, **43**(3): 449-463.

875

876 66. He S, Liang Y, Shao F, Wang X. Toll-like receptors activate programmed necrosis in  
877 macrophages through a receptor-interacting kinase-3-mediated pathway. *Proc Natl*  
878 *Acad Sci U S A* 2011, **108**(50): 20054-20059.

879

880 67. Rickard JA, O'Donnell JA, Evans JM, Lalaoui N, Poh AR, Rogers T, *et al.* RIPK1 regulates  
881 RIPK3-MLKL-driven systemic inflammation and emergency hematopoiesis. *Cell* 2014,  
882 **157**(5): 1175-1188.

883

884 68. Dillon CP, Weinlich R, Rodriguez DA, Cripps JG, Quarato G, Gurung P, *et al.* RIPK1 blocks  
885 early postnatal lethality mediated by caspase-8 and RIPK3. *Cell* 2014, **157**(5): 1189-1202.

886

887 69. Heger K, Wickliffe KE, Ndoja A, Zhang J, Murthy A, Dugger DL, *et al.* OTULIN limits cell  
888 death and inflammation by deubiquitinating LUBAC. *Nature* 2018, **559**(7712): 120-124.

889

890 70. Lafont E, Draber P, Rieser E, Reichert M, Kupka S, de Miguel D, *et al.* TBK1 and IKKepsilon  
891 prevent TNF-induced cell death by RIPK1 phosphorylation. *Nat Cell Biol* 2018, **20**(12):  
892 1389-1399.

893

894 71. Hughes MA, Harper N, Butterworth M, Cain K, Cohen GM, MacFarlane M. Reconstitution  
895 of the death-inducing signaling complex reveals a substrate switch that determines  
896 CD95-mediated death or survival. *Mol Cell* 2009, **35**(3): 265-279.

897

898 72. Chang DW, Xing Z, Capacio VL, Peter ME, Yang X. Interdimer processing mechanism of  
899 procaspase-8 activation. *EMBO J* 2003, **22**(16): 4132-4142.

900

901 73. Brumatti G, Ma C, Lalaoui N, Nguyen NY, Navarro M, Tanzer MC, *et al.* The caspase-8  
902 inhibitor emricasan combines with the SMAC mimetic birinapant to induce necroptosis

903 and treat acute myeloid leukemia. *Sci Transl Med* 2016, **8**(339): 339ra369.  
904  
905 74. Zhang X, Zhang H, Xu C, Li X, Li M, Wu X, *et al.* Ubiquitination of RIPK1 suppresses  
906 programmed cell death by regulating RIPK1 kinase activation during embryogenesis. *Nat*  
907 *Commun* 2019, **10**(1): 4158.  
908  
909 75. Zhang X, Fan C, Zhang H, Zhao Q, Liu Y, Xu C, *et al.* MLKL and FADD Are Critical for  
910 Suppressing Progressive Lymphoproliferative Disease and Activating the NLRP3  
911 Inflammasome. *Cell Rep* 2016, **16**(12): 3247-3259.  
912  
913  
914

915 **ACKNOWLEDGEMENTS**

916 We thank Dr. Xiaodong Wang (National Institute of Biological Sciences, Beijing, China)  
917 for providing *Ripk3*<sup>-/-</sup> mice. The authors thank Zhonghui Weng (Shanghai Institute of  
918 Nutrition and Health, Chinese Academy of Sciences) for animal studies and Lin Qiu  
919 (Shanghai Institute of Nutrition and Health, Chinese Academy of Sciences) for flow  
920 cytometry technical support.

921 **AUTHOR CONTRIBUTIONS**

922 X.M.L and H.B.Z designed the study and performed data analyses; X.M.L and L.F  
923 carried out most of experiments with assistance from X.X.Z, M.L, L.X.W, J.L.L, X.H.W,  
924 Y.J.O, M.Y.X, Y.Z, J.S.D and X.Z.W. H.W.Z and Q.Z assisted with cell death analyses  
925 *in vitro* and Fas-induced apoptosis *in vivo*, X.X.W helped to perform mouse breeding.  
926 J.B.L, Y.L and Y.W.Z provided essential reagents and intellectual input. H.B.Z and  
927 X.M.L coordinated the project and wrote the paper with the help from L.F. H.B.Z  
928 supervised the project.

929 **FUNDING**

930 This work was supported by grants from the Strategic Priority Research Program of  
931 Chinese Academy of Sciences (Grant No. XDA26040306), the National Natural  
932 Science Foundation of China (31970688,31771537,82001684, 81871101) and the  
933 National Key Research and Development Program of China (2018YFC1200201,  
934 2016YFC1304900). We also thank support from Shanghai Frontiers Science Center of  
935 Cellular Homeostasis and Human Diseases.

936 **ETHIC STATEMENT**

937 Our studies did not include human participates, human data or human tissues. Animal  
938 experiments were conducted in accordance with the guidelines of the Institutional  
939 Animal Care and Use Committee of the Institute of Nutrition and Health, Shanghai  
940 Institutes for Biological Sciences, University of Chinese Academy of Sciences.

941 **COMPETING INTERESTS**

942 The authors declare no competing interests.

943

944 **Additional information**

945 **Supplementary information**

946 Supplementary information includes seven figures.

947 **Correspondence** and requests for materials should be addressed to H.B.Z.

948

949 **Figure Legends**

950

951 **Figure 1. *Casp8*<sup>ΔE385/ΔE385</sup> mice are viable and develop a slight lymphopenia.**

952 **(A)** Western blot of primary wild-type (WT) MDFs which were treated with TNF-α  
953 (40 ng/ml) +Cycloheximide (CHX) (40 μg/ml) (TC) for the indicated time.

954 **(B)** Western blot of primary WT MDFs which were treated with TNF-α (20 ng/ml)  
955 +Smac mimetic (Smac) (1 μM) +zVAD (20 μM) (TSZ).

956 **(C)** Western blot of RIPK1, RIPK3, MLKL, FADD, caspase-8, and GAPDH in the  
957 indicated organs of WT (1) and *Casp8*<sup>ΔE385/ΔE385</sup> (2) mice.

958 **(D)** Lymph nodes and spleens removed from 16-week old mice of indicated genotypes  
959 (scale bar, 1cm).

960 **(E)** Dot plot of weight of lymph nodes (parts showed in **Figure 1D**) and spleens of 12-  
961 to 16-week old WT, *Casp8*<sup>ΔE385/ΔE385</sup> mice. Bars, mean±SD. *P* values above the asterisk  
962 (unpaired, two-tailed t-test) \*\*\*\**p*<0.0001, compared to the WT mice.

963 **(F)** Different cell subsets from spleen, lymph nodes (parts showed in **Figure 1D**) and  
964 bone marrow of 12- to 16-week old WT and *Casp8*<sup>ΔE385/ΔE385</sup> mice were analyzed by  
965 flow cytometry using the following markers: B cells (B220<sup>+</sup> or CD19<sup>+</sup>), T cells (CD3<sup>+</sup>),  
966 CD4<sup>+</sup> T cells (CD3<sup>+</sup>CD4<sup>+</sup>CD8<sup>-</sup>), CD8<sup>+</sup> T cells (CD3<sup>+</sup>CD8<sup>+</sup>CD4<sup>-</sup>), Granulocytes and  
967 Macrophages (CD11b<sup>+</sup>), mature B cells in spleen (B220<sup>+</sup>IgM<sup>+</sup> or B220<sup>+</sup>CD19<sup>+</sup>),  
968 immature and mature B cells in bone marrow (B220<sup>+</sup> IgM<sup>+</sup> or B220<sup>hi</sup> CD19<sup>hi</sup>),  
969 progenitor B cells (pro-B) and precursor B cells (pre-B) in bone marrow (B220<sup>+</sup> IgM<sup>-</sup>  
970 or B220<sup>low</sup> CD19<sup>low</sup>). Bars, mean±SD. *P* values above the asterisk (unpaired, two-tailed  
971 t-test) \**p*<0.05, \*\**p*<0.05, \*\*\*\**p*<0.0001.

972

973

974 **Figure 2. The CASP8( $\Delta$ E385) compromises apoptosis, particularly switches TNF-**  
975  **$\alpha$  induced apoptosis to necroptosis.**

976 **(A)** Western blotting analysis of the indicated protein in primary WT and  
977 Casp8 $\Delta$ E385/ $\Delta$ E385 thymocytes which were treated with FasL (Jo-2) (1  $\mu$ g/ml) for the  
978 indicated time. The data are representative of three independent experiments.

979 **(B)** Primary WT and Casp8<sup>AE385/AE385</sup> MDFs were treated with GSK'872 in different  
980 concentration for the indicated time respectively. Bars, mean $\pm$ SD. *P* values above the  
981 asterisk (unpaired, two-tailed t-test) \**p*<0.05, \*\**p*<0.01, \*\*\*\**p*<0.0001.

982 **(C)** Western blotting analysis of protein expression of caspase-8, cleaved caspase-8,  
983 cleaved caspase-3 and GAPDH in primary WT and Casp8<sup>AE385/AE385</sup> MDFs which were  
984 treated with GSK'872 (20  $\mu$ M) for the indicated time.

985 **(D)** Mouse survival curve of 8- to 12-week old mice after challenged by anti-Fas  
986 antibody (Jo-2, 0.5  $\mu$ g/g, i.v.). F, female. *P* values alongside the asterisk, two-sided Log-  
987 rank (Mantel-Cox) test, \*\**p*<0.01.

988 **(E)** The alanine transaminase (ALT) and aspartate transaminase (AST) levels in serum  
989 of the 16-week old WT, Casp8<sup>AE385/AE385</sup> mice 2.5h after anti-Fas injection. Bars,  
990 mean $\pm$ SD. *P* values above the asterisk (unpaired, two-tailed t-test), \*\**p*<0.01.

991 **(F)** Primary WT and Casp8<sup>AE385/AE385</sup> MDFs were treated with TNF- $\alpha$  (20 ng/ml), TNF-  
992  $\alpha$ +Smac (1  $\mu$ M) (TS), TNF- $\alpha$ +CHX (20  $\mu$ g/ml) (TC) for 5 hours. Bars, mean $\pm$ SD. *P*  
993 values above the asterisk (unpaired, two-tailed t-test) \*\*\**p*<0.001.

994 **(G)** Immunoblotting of the indicated protein expression in primary WT and  
995 Casp8<sup>AE385/AE385</sup> MDFs which were treated with TNF- $\alpha$  (40 ng/ml) +CHX (40  $\mu$ g/ml)  
996 (TC) for the indicated time.

997

998

999

1000 **Figure 3. The CASP8( $\Delta$ E385) promotes necroptosis *in vitro*.**

1001 **(A)** Primary WT and *Casp8* <sup>$\Delta$ E385/ $\Delta$ E385</sup> MDFs were treated with TNF- $\alpha$  (20 ng/ml)+Smac  
1002 (1  $\mu$ M)+zVAD (20  $\mu$ M) (TSZ) and TNF- $\alpha$ +Smac+zVAD+Nec-1 (30  $\mu$ M) (TSZN) for  
1003 6.45 hours, TNF- $\alpha$ +CHX (20  $\mu$ g/ml)+zVAD (20  $\mu$ M) (TCZ) and TNF-  
1004  $\alpha$ +CHX+zVAD+Nec-1 (30  $\mu$ M) (TCZN) for 4.45 hours. Bars, mean $\pm$ SD. *P* values  
1005 above the asterisk (unpaired, two-tailed t-test) \*\*\*\**p*<0.0001.

1006 **(B)** Primary WT and *Casp8* <sup>$\Delta$ E385/ $\Delta$ E385</sup> bone marrow derived macrophages (BMDMs)  
1007 were treated with LPS (100 ng/ml), LPS+zVAD (20  $\mu$ M) (LZ), LPS+zVAD+Nec-1 (30  
1008  $\mu$ M) (LZN), poly(I:C) (100  $\mu$ g/ml), poly(I:C)+zVAD (20  $\mu$ M) (PZ),  
1009 poly(I:C)+zVAD+Nec-1 (30  $\mu$ M) (PZN), TNF- $\alpha$ +Smac+zVAD (TSZ), TNF-  
1010  $\alpha$ +Smac+zVAD+Nec-1 (TSZN) for 3 hours. Bars, mean $\pm$ SD. *P* values above the  
1011 asterisk (unpaired, two-tailed t-test) \*\*\**p*<0.001, \*\*\*\**p*<0.0001.

1012 **(C)** Immunoblotting of the indicated protein expression in primary WT and  
1013 *Casp8* <sup>$\Delta$ E385/ $\Delta$ E385</sup> MDFs which were treated with TNF- $\alpha$  (20 ng/ml) +Smac (1  $\mu$ M)  
1014 +zVAD (20  $\mu$ M) (TSZ) for the indicated time.

1015 **(D)** Immunoblotting of primary WT and *Casp8* <sup>$\Delta$ E385/ $\Delta$ E385</sup> MDFs which were treated  
1016 with TNF- $\alpha$  (20 ng/ml) +Smac (1  $\mu$ M) +zVAD (20  $\mu$ M) (TSZ) for the indicated time.

1017 **(E)** WT and *Casp8* <sup>$\Delta$ E385/ $\Delta$ E385</sup> MDFs were treated with TNF- $\alpha$  (40 ng/ml)+CHX  
1018 (40 $\mu$ g/ml)+zVAD (50  $\mu$ M) for the indicated time, complex II was immunoprecipitated  
1019 using anti-RIPK1, the recruitment of RIPK3, FADD and caspase-8 were detected by  
1020 western blotting.

1021 **(F)** Primary WT and *Casp8* <sup>$\Delta$ E385/ $\Delta$ E385</sup> BMDMs were treated with LPS (200  
1022 ng/ml)+zVAD (40  $\mu$ M) followed by western blot and immunoprecipitation.

1023 **(G)** Primary WT and *Casp8* <sup>$\Delta$ E385/ $\Delta$ E385</sup> MDFs were treated with TNF- $\alpha$  (40 ng/ml)+CHX  
1024 (40 $\mu$ g/ml) followed by western blot and immunoprecipitation.

1025



1026 **Figure 4. The CASP8( $\Delta$ E385) promotes necroptosis *in vivo*.**

1027 **(A)** Mouse survival curve of 8- to 16-week old mice after injection by TNF- $\alpha$  (7  $\mu$ g  
1028 each mouse, i.v.). M, male, F, female. *P* values alongside the asterisk, by two-sided  
1029 Log-rank (Mantel-Cox) test. \*\*\*\**p*<0.0001.

1030 **(B)** Body temperature of 8- to 16-week old mice after injection by TNF- $\alpha$  (7  $\mu$ g each  
1031 mouse, i.v.). M, male, F, female. Bars, mean $\pm$ SD. The significance of body temperature  
1032 between WT and *Casp8* <sup>$\Delta$ E385/ $\Delta$ E385</sup> mice in the indicated time was described by *P* values  
1033 below the asterisk (unpaired, two-tailed t-test) \**p*<0.05, \*\**p*<0.01, \*\*\*\**p*<0.0001.

1034 **(C)** Representative peritoneal macrophages flow cytometric dot plots along CD11b  
1035 versus F4/80 parameters. Untreated (UT), LPS+zVAD (LZ).

1036 **(D)** Dot plots of CD11b+F4/80+ peritoneal macrophages of 8- to 12-week old WT,  
1037 *Casp8* <sup>$\Delta$ E385/ $\Delta$ E385</sup> and *Ripk1*<sup>+/-</sup>*Ripk3*<sup>-/-</sup>*Casp8* <sup>$\Delta$ E385/ $\Delta$ E385</sup> mice. Bars, mean+SD. *P* values  
1038 (unpaired, two-tailed t-test) \*\*\*\**p*<0.0001.

1039

1040

1041 **Figure 5. *Casp8* <sup>$\Delta E385/\Delta E385$</sup> *Ripk3*<sup>-/-</sup> mice develop serious lymphopenia and myeloid**  
1042 **bias but prevent the postnatal lethality of *Ripk1*<sup>-/-</sup> mice.**

1043 **(A)** Splens images (15 week) (left) and total spleen weight (14- to 17-week old) (right)  
1044 of the indicated genotype mice. Scale bar, 1 cm. Bars, mean $\pm$ SD. *P* values above the  
1045 asterisk (unpaired, two-tailed t-test) \*\*\*\**p*<0.0001.

1046 **(B)** The immunocytes cell number in spleen and bone marrow (per tibia and femur) of  
1047 14- to 17-week old mice. Bars, mean $\pm$ SD. *P* values (unpaired, two-tailed t-test) \**p*<0.05,  
1048 \*\**p*<0.01, \*\*\**p*<0.001, \*\*\*\**p*<0.0001.

1049 **(C)** The B cell and T cell subsets cellularity in spleen and bone marrow (per tibia and  
1050 femur) of 14- to 17-week old mice. Bars, mean $\pm$ SD. *P* values (unpaired, two-tailed t-  
1051 test) \**p*<0.05, \*\**p*<0.01, \*\*\**p*<0.001, \*\*\*\**p*<0.0001.

1052 **(D)** The absolute cell number of the white blood cells and their subsets in the peripheral  
1053 blood of 14- to 17-week old mice. Bars, mean $\pm$ SD. *P* values (unpaired, two-tailed t-  
1054 test) \**p*<0.05, \*\**p*<0.01, \*\*\**p*<0.001, \*\*\*\**p*<0.0001.

1055 **(E)** The B cell and T cell subsets cellularity in the peripheral blood of 14- to 17-week  
1056 old mice. Bars, mean $\pm$ SD. *P* values (unpaired, two-tailed t-test) \*\**p*<0.01, \*\*\**p*<0.001,  
1057 \*\*\*\**p*<0.0001.

1058 **(F)** Mouse survival curve of the given genotypes after birth. *P* values alongside the  
1059 asterisk, two-sided Log-rank (Mantel-Cox) test, \*\*\*\**p*<0.0001.

1060

1061

1062

1063 **Figure 6. Halving the RIPK1 dosage rescues transplantable lymphopenia and**  
1064 **myeloid bias in *Ripk3*<sup>-/-</sup> *Casp8*<sup>AE385/AE385</sup> mice.**

1065 **(A)** Spleen images (12 week) (left) and total spleen weight (14-17 week) (right) showed  
1066 normal sized spleen in the *Ripk1*<sup>+/-</sup> *Ripk3*<sup>-/-</sup> *Casp8*<sup>AE385/AE385</sup> mice. Scale bar, 1 cm. Bars,  
1067 mean±SD. *P* values above the asterisk (unpaired, two-tailed t-test) \*\*\*\**p*<0.0001; ns,  
1068 no significance.

1069 **(B)** The absolute cell number of indicated immunocytes in spleen and bone marrow (per  
1070 tibia and femur) of 14- to 17-week old age matched mice. Bars, mean±SD. *P* values  
1071 (unpaired, two-tailed t-test) \*\**p*<0.01, \*\*\**p*<0.001, \*\*\*\**p*<0.0001; ns, no significance.

1072 **(C)** The cell number of white blood cells and their subsets in the peripheral blood of  
1073 14- to 17-week old mice. Bars, mean±SD. *P* values (unpaired, two-tailed t-test) \**p*<0.05,  
1074 \*\*\**p*<0.001, \*\*\*\**p*<0.0001; ns, no significance.

1075 **(D)** The absolute cell number and percentage of white blood cells and their subsets in  
1076 the peripheral blood of 6-month old recipients. Bars, mean±SD. *P* values (unpaired,  
1077 two-tailed t-test) \**p*<0.05, \*\**p*<0.01, \*\*\**p*<0.001, \*\*\*\**p*<0.0001.

1078 **(E)** The absolute cell number of the immunocytes and their subsets in the spleen of 6-  
1079 month old recipients. Bars, mean±SD. *P* values (unpaired, two-tailed t-test) \**p*<0.05,  
1080 \*\**p*<0.01, \*\*\**p*<0.001, \*\*\*\**p*<0.0001.

1081 **(F)** The absolute cellularity of the immunocytes and their subsets in the bone marrow  
1082 per tibia and femur of 6-month old recipients. Bars, mean±SD. *P* values (unpaired, two-  
1083 tailed t-test) \**p*<0.05, \*\**p*<0.01, \*\*\**p*<0.001.

1084

1085

1086

1087

1088 **Supplemental Figure Legends**

1089

1090 **Figure S1. *Casp8*<sup>ΔE385/ΔE385</sup> mice developed normally.**

1091 (A) Schematic diagram of wild-type *Casp8* locus and *Casp8*<sup>ΔE385/ΔE385</sup> allele. Three  
1092 adjacent nucleotides (red AAG and red asterisk labeled in locus) were removed resulted  
1093 in the deletion of Glutamic acid (E) in the 385 position of caspase-8 protein sequence.  
1094 The mutation was confirmed by sequencing.

1095 (B) Photograph of an 8-week-old *Casp8*<sup>ΔE385/ΔE385</sup> mouse alongside a WT littermate.

1096 (C) Primary WT and *Casp8*<sup>ΔE385/ΔE385</sup> BMDMs were treated with LPS (200ng/ml)+BV6  
1097 (4 μM) followed by western blot.

1098 (D) Western blot of RIPK1, RIPK3, MLKL, FADD, caspase-8, and GAPDH in the  
1099 indicated organs of WT (1) and *Casp8*<sup>ΔE385/ΔE385</sup> (2) mice.

1100 (E) Representative images of Hematoxylin and eosin-stained liver, lung and skin  
1101 sections of 12-week old WT, *Casp8*<sup>ΔE385/ΔE385</sup> mice (scale bar, 100 μm).

1102

1103

1104 **Figure S2. The CASP8(ΔE385) caspase-8 compromises Fas-induced apoptosis *in***  
1105 ***vitro* and *in vivo*.**

1106 (A) The primary WT and *Casp8*<sup>ΔE385/ΔE385</sup> thymocytes died after prolonged incubation  
1107 with FasL (Jo-2). FACS analysis of the primary WT (upper panels) and *Casp8*<sup>ΔE385/ΔE385</sup>  
1108 (lower panels) thymocytes incubated for 24 h with FasL (2μg/ml) and stained with  
1109 FITC-annexin V and PI.

1110 (B) Representative images (n>3) of Hematoxylin and eosin-stained (H&E) liver  
1111 sections and cleaved caspase-3 (CC3) immunohistochemistry of the 16-week old WT,  
1112 *Casp8*<sup>ΔE385/ΔE385</sup> mice treated with anti-Fas i.v. for 2.5h (scale bar, 100 μm).

1113 (C) Western blot of livers of 16-week old WT and *Casp8*<sup>ΔE385/ΔE385</sup> mice which were  
1114 treated with anti-Fas antibody (Jo-2, 0.5 μg/g, i.v.) for 2.5h. Each number represents a  
1115 mouse.

1116

1117

1118 **Figure S3. The CASP8( $\Delta$ E385) switches TNF- $\alpha$  induced apoptosis to necroptosis**  
1119 **and promotes necroptosis.**

1120 **(A)** Primary WT and *Casp8* <sup>$\Delta$ E385/ $\Delta$ E385</sup> MDFs were treated with TNF- $\alpha$  (40 ng/ml)  
1121 +Smac (2  $\mu$ M) for the indicated time.

1122 **(B)** Immunoblotting of primary WT and *Casp8* <sup>$\Delta$ E385/ $\Delta$ E385</sup> MDFs which were treated  
1123 with TNF- $\alpha$  (40 ng/ml) +CHX (40  $\mu$ g/ml) +zVAD (20  $\mu$ M) (TCZ) for the indicated time.

1124 **(C)** Immunoblotting of the indicated protein expression in primary WT and  
1125 *Casp8* <sup>$\Delta$ E385/ $\Delta$ E385</sup> BMDMs which were challenged by LPS (200 ng/ml) (L), LPS+zVAD  
1126 (40  $\mu$ M) (LZ) for 6 hours, respectively.

1127 **(D)** Primary WT and *Casp8* <sup>$\Delta$ E385/ $\Delta$ E385</sup> BMDMs were treated with LPS (200ng/ml)+BV6  
1128 (4  $\mu$ M) followed by western blot and immunoprecipitation.

1129

1130

1131 **Figure S4. The *Ripk3*<sup>-/-</sup>*Casp8* <sup>$\Delta$ E385/ $\Delta$ E385</sup> and *Mkl1*<sup>-/-</sup>*Casp8* <sup>$\Delta$ E385/ $\Delta$ E385</sup> mice developed**  
1132 **lymphopenia and myeloid bias.**

1133 **(A)** Representative flow cytometric images (n>3) of B cells and T cells in spleen of 16-  
1134 week old mice.

1135 **(B)** The percentage of B cells (CD19<sup>+</sup>), T cells (CD3<sup>+</sup>) and myeloid-derived cells  
1136 (CD11b<sup>+</sup>) in spleen and bone marrow (per tibia and femur) of 14- to 17-week old mice.  
1137 Bars, mean $\pm$ SD. *P* values (unpaired, two-tailed t-test) \**p*<0.05, \*\**p*<0.01, \*\*\**p*<0.001,  
1138 \*\*\*\**p*<0.0001.

1139 **(C)** The percentage of immunocyte subsets in spleen and bone marrow (per tibia and  
1140 femur) of 14- to 17-week old mice. Bars, mean $\pm$ SD. *P* values (unpaired, two-tailed t-  
1141 test) \**p*<0.05, \*\**p*<0.01, \*\*\**p*<0.001, \*\*\*\**p*<0.0001.

1142 **(D)** Representative flow cytometric images (n>3) of immature and mature B cells  
1143 (IgM<sup>+</sup>B220<sup>+</sup>/B220<sup>hi</sup>CD19<sup>hi</sup>), progenitor B cells (pro-B) and precursor B cells (pre-B)  
1144 (B220<sup>+</sup>IgM<sup>-</sup>/B220<sup>low</sup>CD19<sup>low</sup>) in bone marrow of 16-week old mice.

1145

1146

1147 **Figure S5. The *Ripk3*<sup>-/-</sup>*Casp8* <sup>$\Delta$ E385/ $\Delta$ E385</sup> partially rescued perinatal lethality of**

1148 ***Ripk1*<sup>-/-</sup> mice but developed RIPK1 dosage-dependent lymphopenia.**  
1149 (A) Photograph of *Ripk1*<sup>-/-</sup>*Ripk3*<sup>-/-</sup>*Casp8*<sup>ΔE385/ΔE385</sup> mouse (P13, post-natal day 13)  
1150 alongside a control mouse (P13). Straight arrows: several small lesion, loss of hair.  
1151 (B) The absolute cell number of B cell and T cell subsets in spleen and bone marrow  
1152 (per tibia and femur) of 14- to 17-week old mice. Bars, mean±SD. *P* values (unpaired,  
1153 two-tailed t-test) \**p*<0.05, \*\**p*<0.01, \*\*\*\**p*<0.0001.  
1154 (C) Representative flow cytometric images (n>3) of B cells and T cells in spleen of 12-  
1155 week old mice.  
1156 (D) Representative flow cytometric images (n>3) of immature and mature B cells  
1157 (IgM<sup>+</sup>B220<sup>+</sup>/B220<sup>hi</sup>CD19<sup>hi</sup>), progenitor B cells (pro-B) and precursor B cells (pre-B)  
1158 (B220<sup>+</sup>IgM<sup>-</sup>/B220<sup>low</sup>CD19<sup>low</sup>) in bone marrow of 12-week old mice.

1159

1160

1161 **Figure S6. The lethally irradiated mice receiving *Ripk3*<sup>-/-</sup>*Casp8*<sup>ΔE385/ΔE385</sup> and *MLK1*<sup>-/-</sup>*Casp8*<sup>ΔE385/ΔE385</sup> bone marrows developed leucopenia.**

1162 (A) Experimental design diagram.  
1163 (B) Splens images (left) and total spleen weight (right) of 6-month old recipients. Scale  
1164 bar, 1 cm. Bars, mean±SD. *P* values (unpaired, two-tailed t-test) \*\**p*<0.01.  
1165 (C) The red blood cells number, platelets number and hemoglobin concentration in the  
1166 peripheral blood of 6-month old recipients. Bars, mean±SD. *P* values (unpaired, two-  
1167 tailed t-test) \**p*<0.05.  
1168 (D) The percentage of the B cell and T cell subsets in the peripheral blood of 6-month  
1169 old recipients. Bars, mean±SD. *P* values (unpaired, two-tailed t-test) \*\**p*<0.01,  
1170 \*\*\**p*<0.001, \*\*\*\**p*<0.0001.  
1171

1172

1173

1174 **Figure S7. Caspase-8 auto-cleavage inhibits necroptosis downstream of TNFR1 by**  
1175 **cleaving RIPK1 and negatively regulating complex II formation and associates**  
1176 **with RIPK3/MLKL to protect from lymphopenia.**

1177 In TNF-α induced apoptosis occurred in *Casp8*<sup>ΔE385/ΔE385</sup> cells, caspase-8 cannot auto-

1178 cleavage between the large and small catalytic subunits which impairs efficient caspase-  
1179 8 activation. CASP8( $\Delta$ E385) attenuates its function of cleaving RIPK1 and caspase-3  
1180 which results in impaired apoptosis and increased RIPK1 activation. This abnormal  
1181 RIPK1 activation brings the stronger RIPK1 phosphorylation and in turn enhanced  
1182 RIPK1-RIPK3-MLKL cascade, which finally switches caspase-3 dependent apoptosis  
1183 to necroptosis. In TNF- $\alpha$  induced necroptosis with addition of zVAD, CASP8( $\Delta$ E385),  
1184 unable to auto-cleavage, functions as a scaffold recruiting more FADD, RIPK3, and  
1185 RIPK1 into complex II and stabilizing complex II, which results in dramatically  
1186 activated RIPK1-RIPK3-MLKL cascade phosphorylation and in turn excessive  
1187 necroptosis. Moreover, CASP8( $\Delta$ E385) associating with RIPK1 promotes  
1188 lymphopenia which is inhibited by RIPK3 and MLKL.  
1189

# Figure 1

**A**

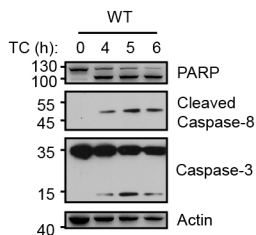

**C**

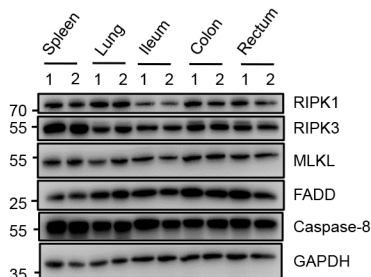

**B**

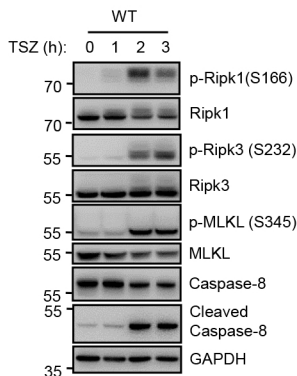

**D**

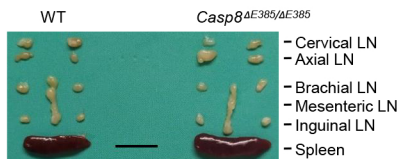

**E**

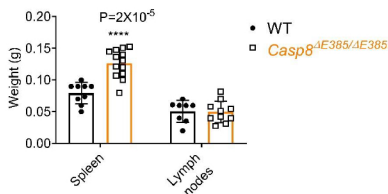

**F**

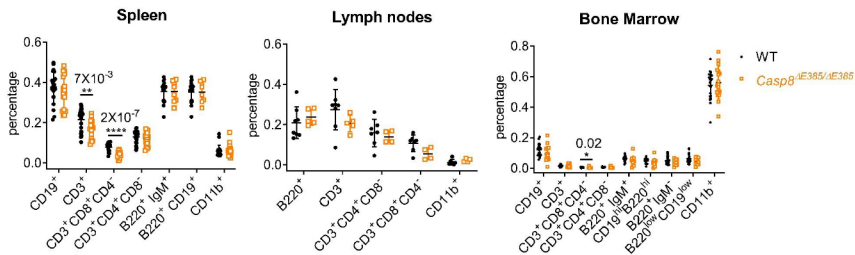



# Figure 2

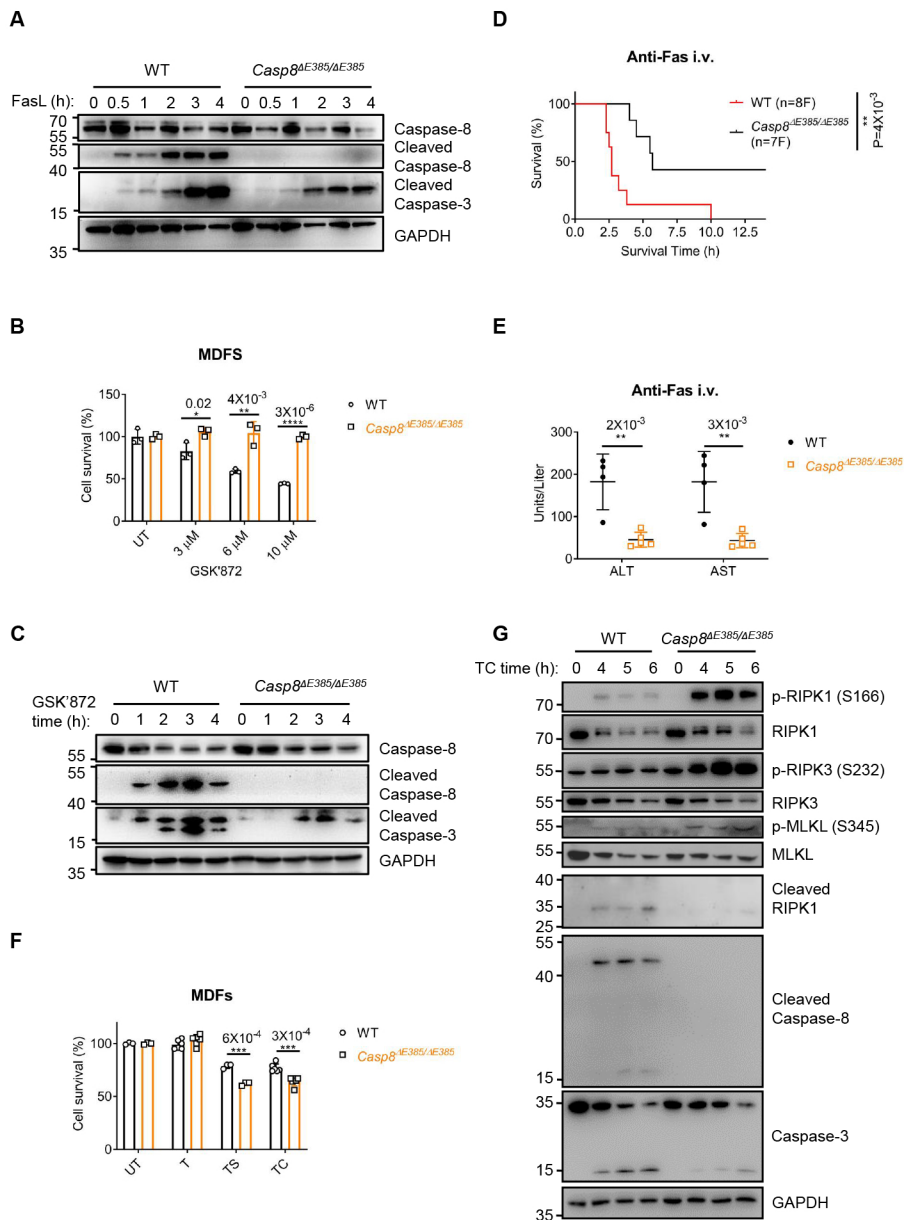

# Figure 3

**A**

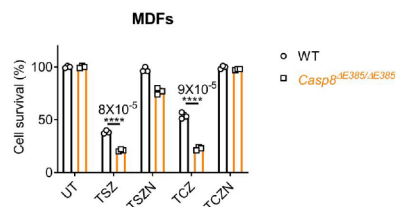

**B**

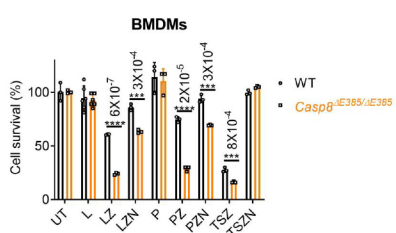

**C**

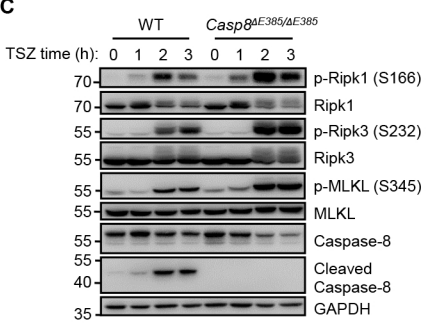

**D**

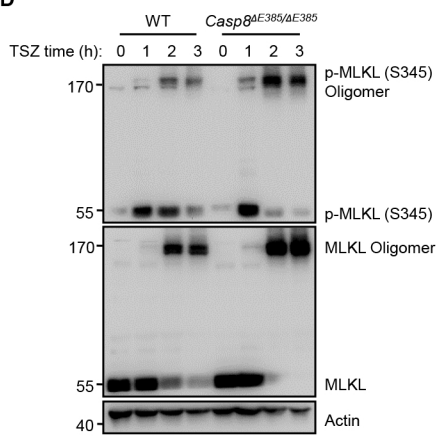

**E**

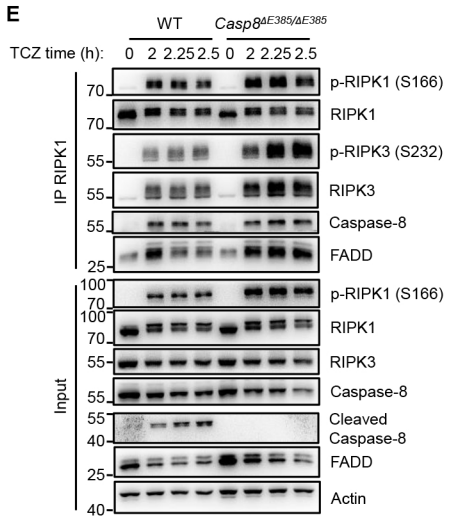

**F**

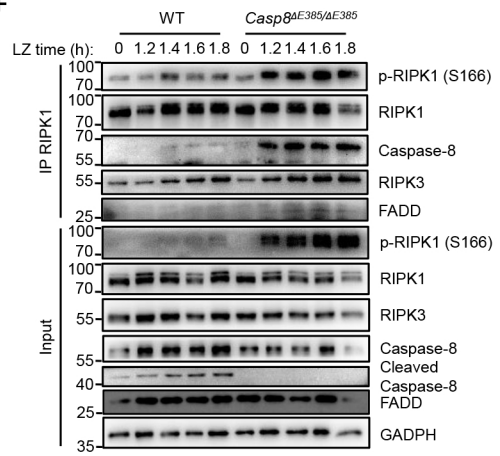

**G**

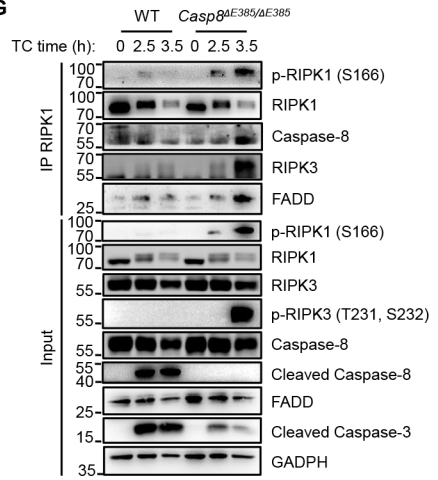

# Figure 4

A

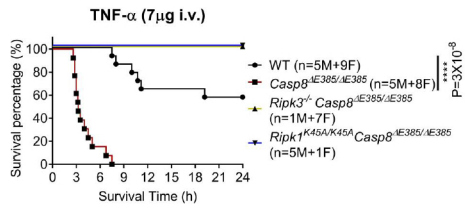

B

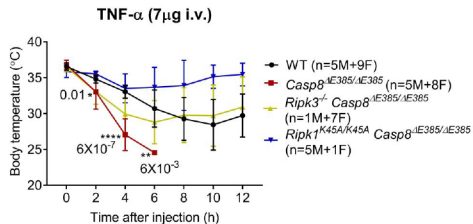

C

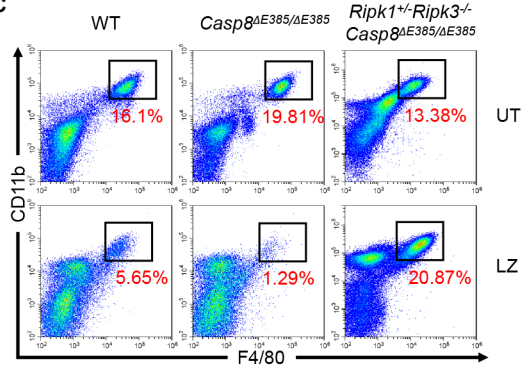

D

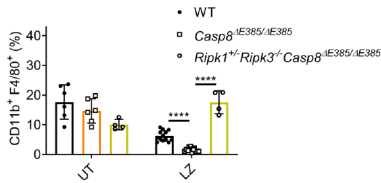

# Figure 5

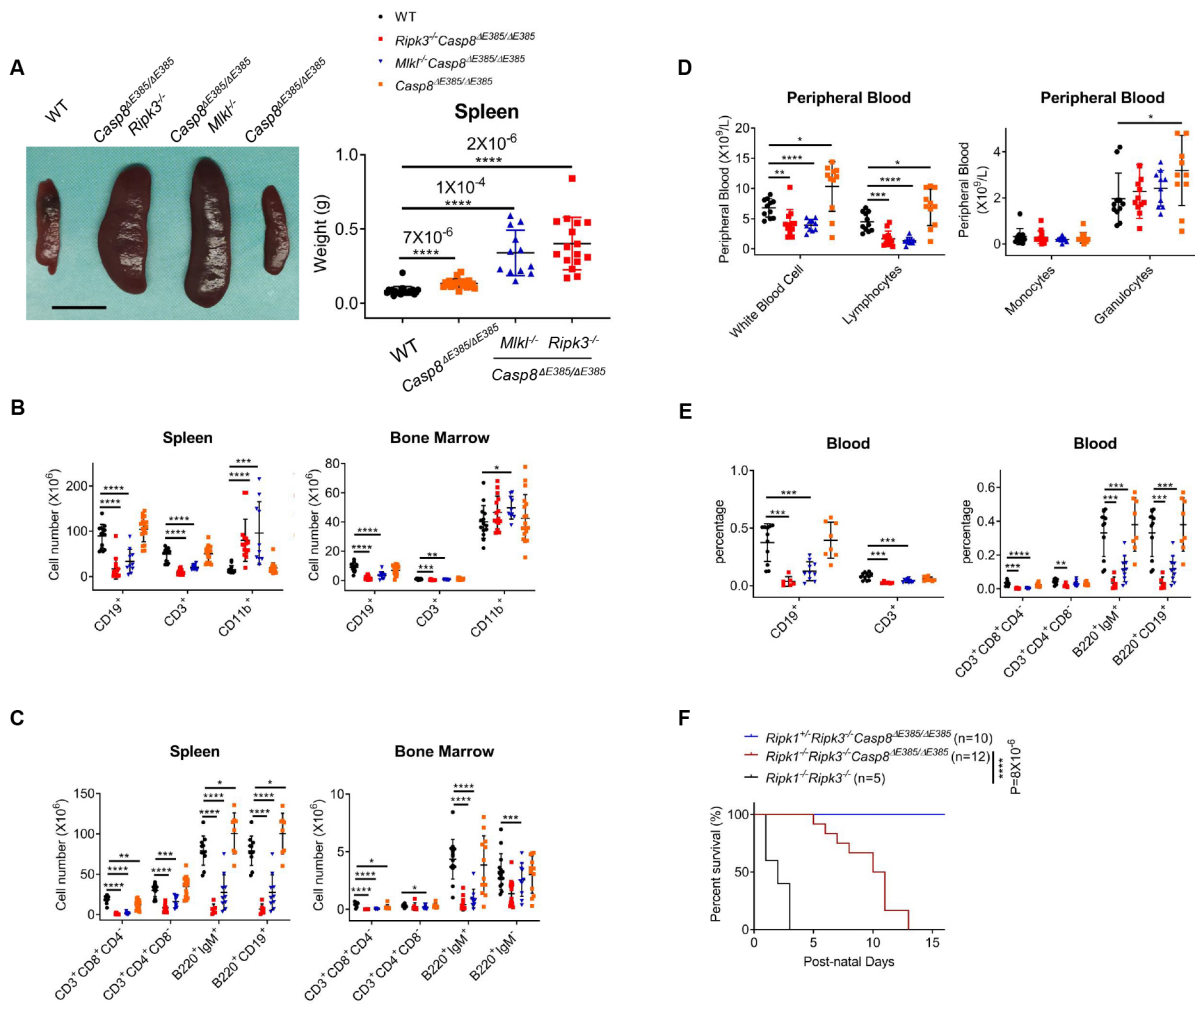

# Figure 6

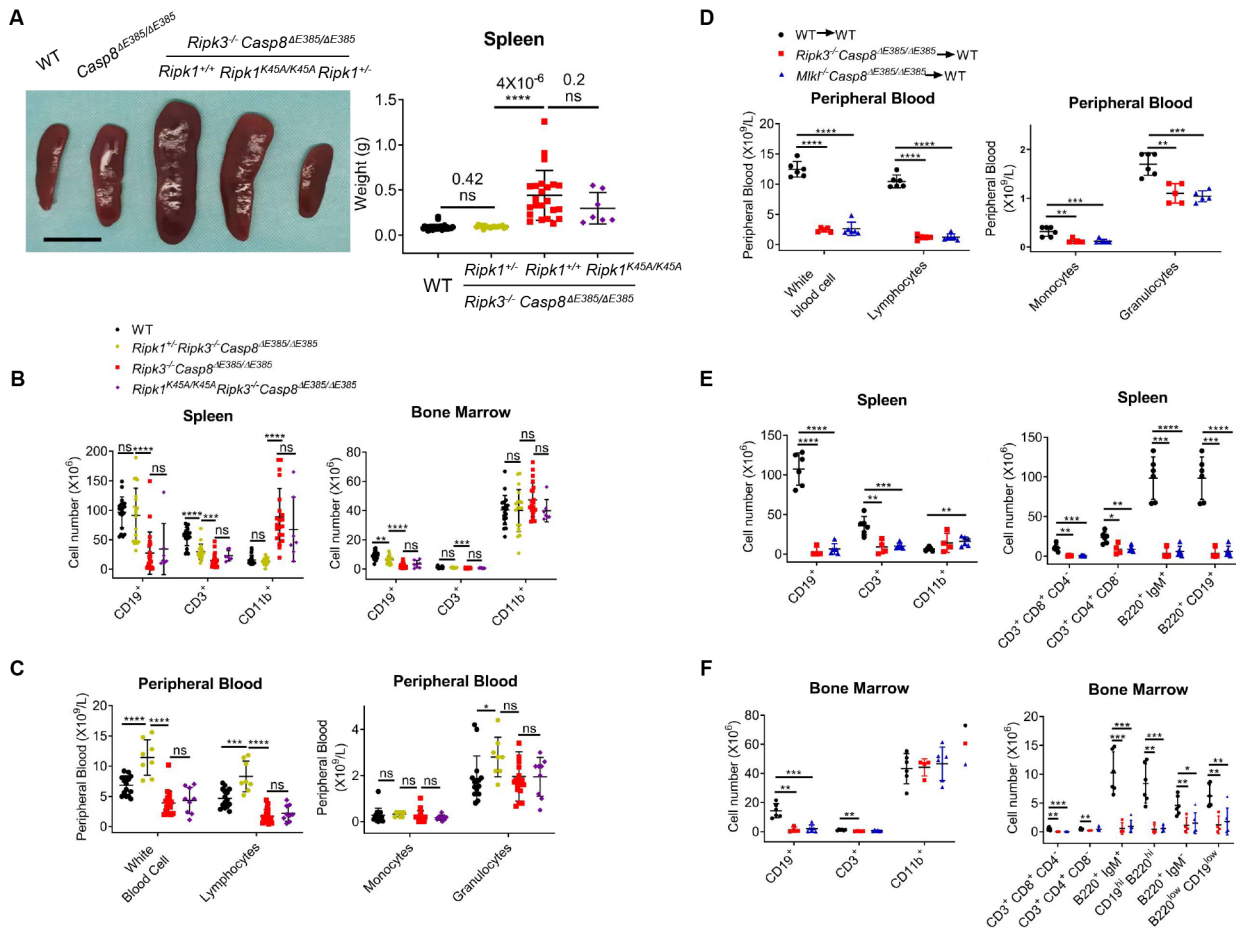

# Figure S1

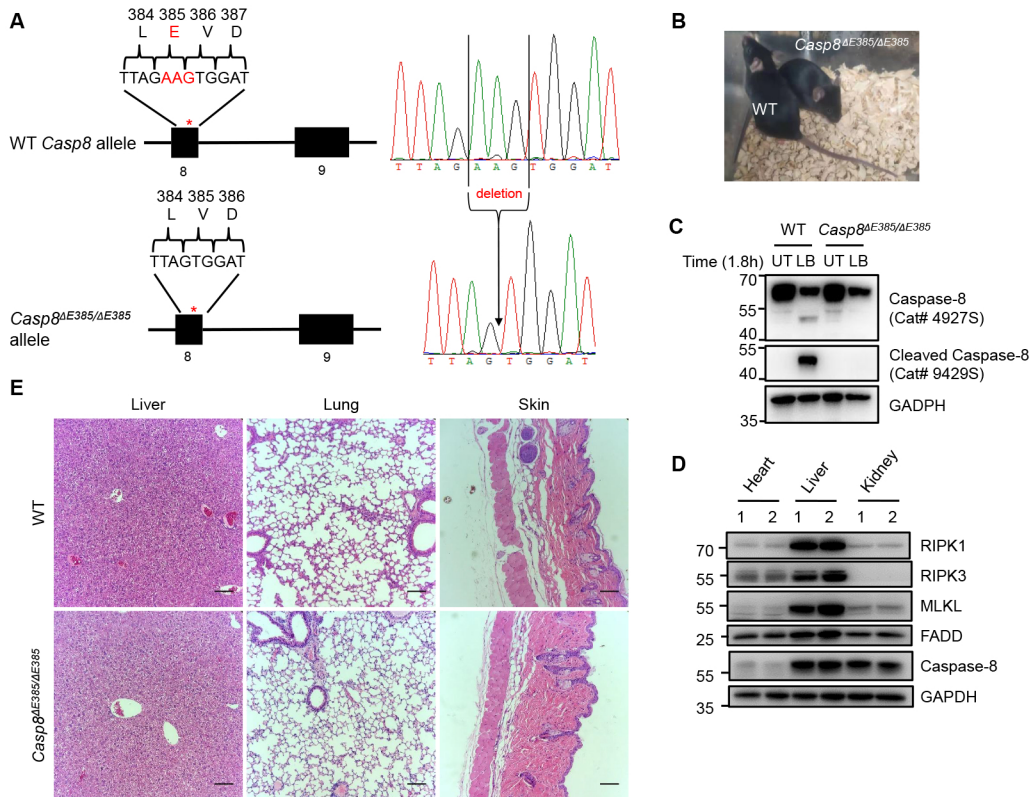

# Figure S2

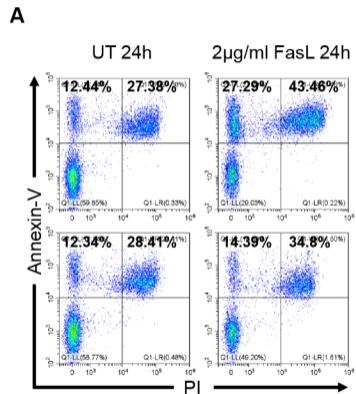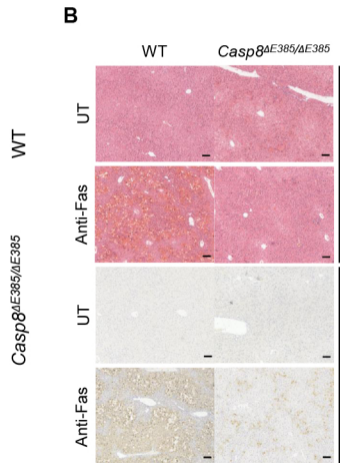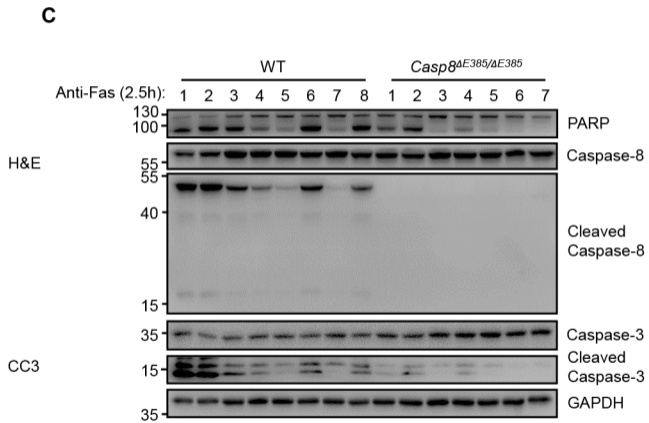

# Figure S3

**A**

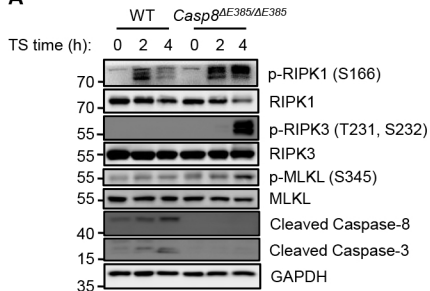

**B**

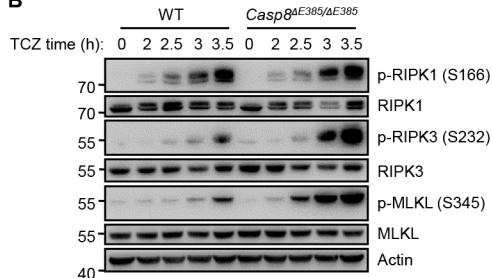

**C**

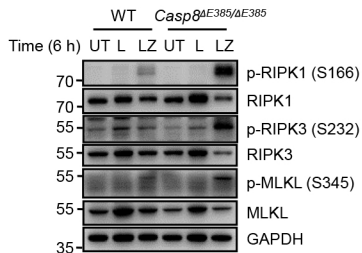

**D**

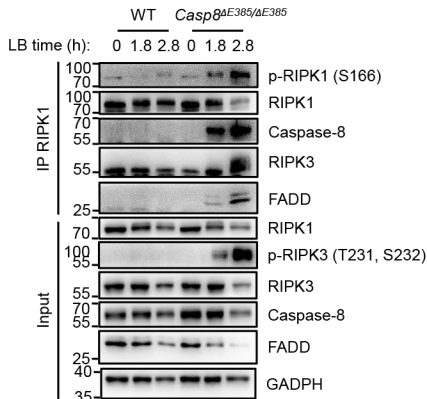



# Figure S4

**A**

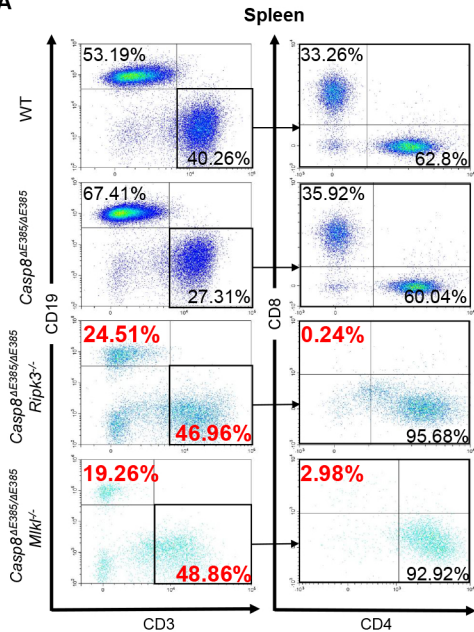

**B**

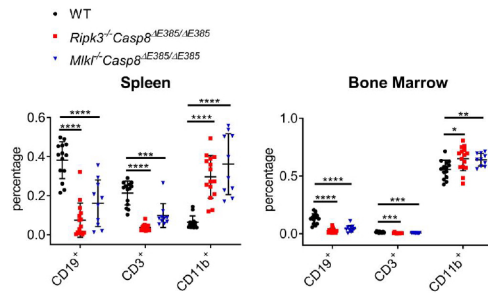

**D**

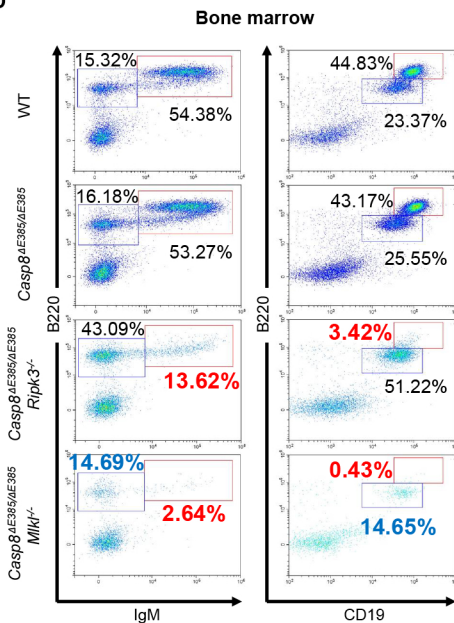

**C**

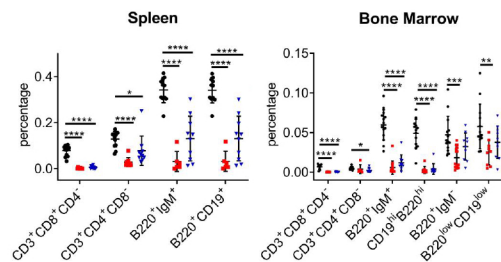

# Figure S5

**A**

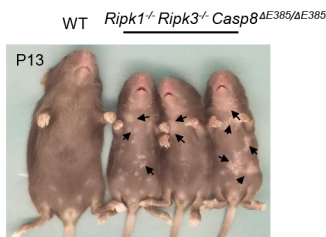

**B**

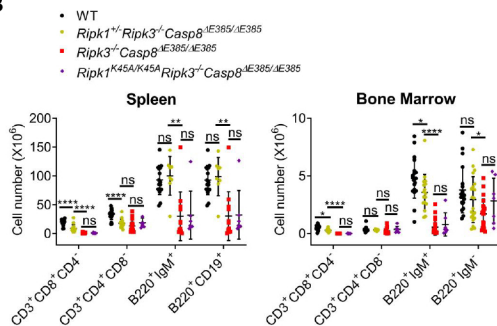

**C**

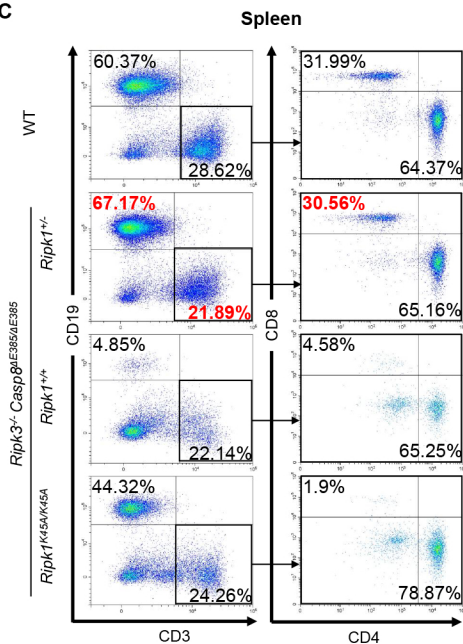

**D**

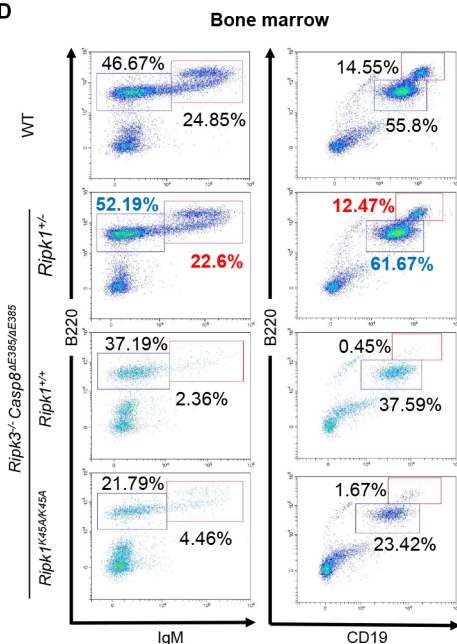

# Figure S6

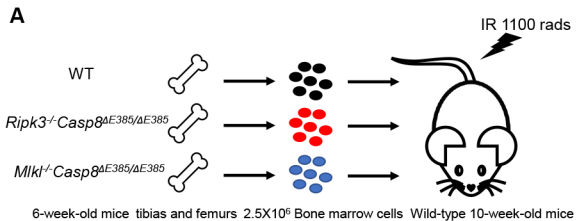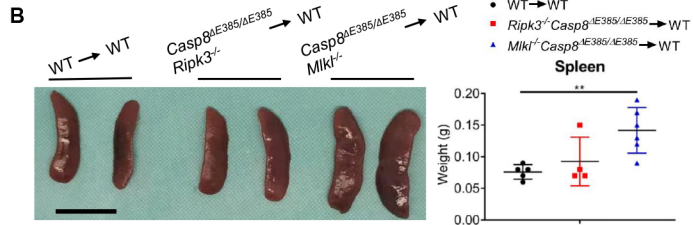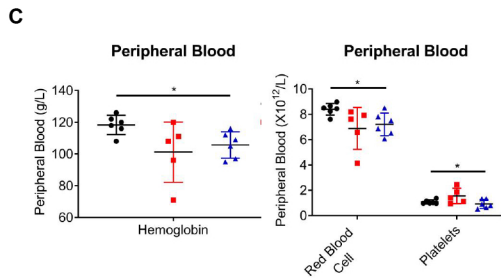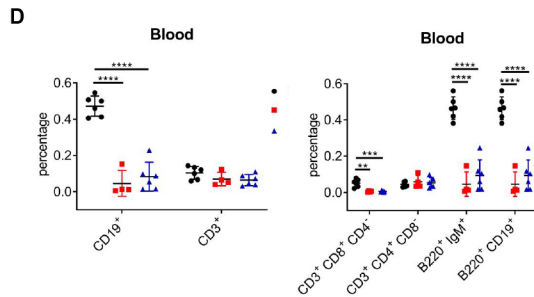

# Figure S7

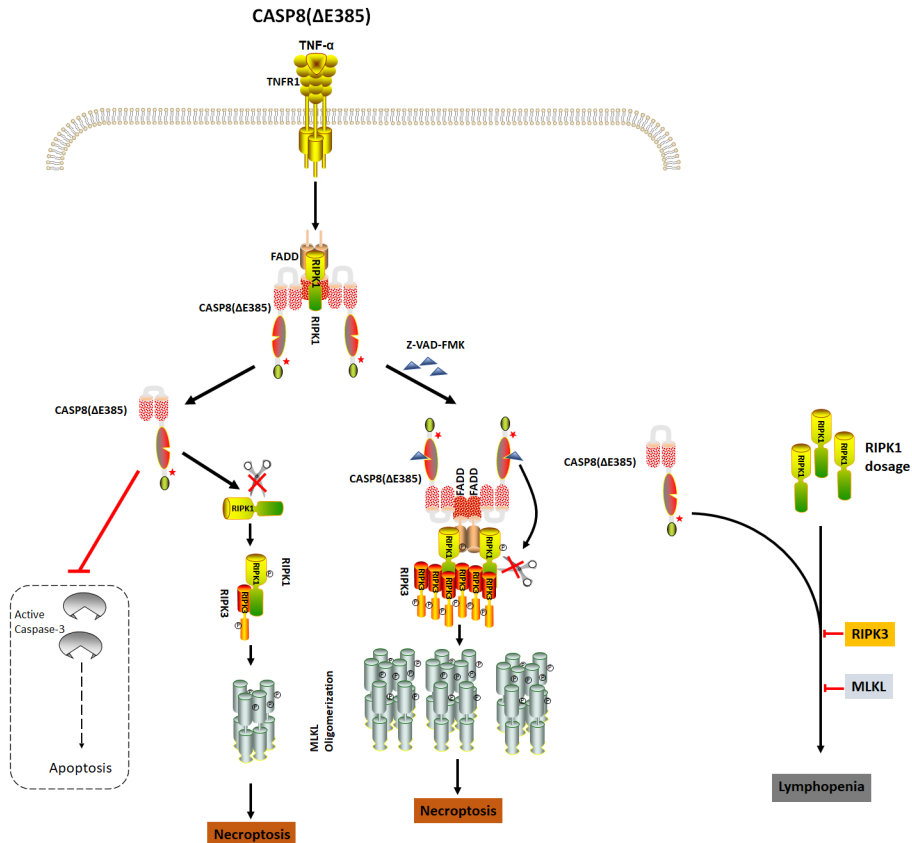

Supplement: 41418_2022_938_MOESM10_ESM.pdf [file 41418_2022_938_MOESM10_ESM.pdf]
